# Supplementary material for: Exosome-mediated genetic reprogramming of tumor-associated macrophages by exoASO-STAT6 leads to potent monotherapy antitumor activity
Source: PubMed Central journal article supplement (PMC8856615; doi:10.1126/sciadv.abj7002), 2022-02-18
Supplement: sciadv.abj7002_sm.pdf [file sciadv.abj7002_sm.pdf]

## Supplementary Materials for

### **Exosome-mediated genetic reprogramming of tumor-associated macrophages by exoASO-STAT6 leads to potent monotherapy antitumor activity**

Sushrut Kamerkar, Charan Leng, Olga Burenkova, Su Chul Jang, Christine McCoy, Kelvin Zhang, Kevin Dooley, Samuel Kasera, Tong Zi, Sílvia Sisó, William Dahlberg, Chang Ling Sia, Shil Patel, Karl Schmidt, Kyriakos Economides, Timothy Soos, Dalia Burzyn\*, Sriram Sathyanarayanan\*

\*Corresponding author. Email: [dalia.burzyn@codiakbio.com](mailto:dalia.burzyn@codiakbio.com) (D.B.); [sriram.sathy@codiakbio.com](mailto:sriram.sathy@codiakbio.com) (S.Sa.)

Published 18 February 2022, *Sci. Adv.* **8**, eabj7002 (2022)  
DOI: [10.1126/sciadv.abj7002](https://doi.org/10.1126/sciadv.abj7002)

#### **This PDF file includes:**

Supplementary Materials and Methods  
Figs. S1 to S6  
Tables S1 to S5

## SUPPLEMENTARY MATERIALS AND METHODS

### Isolation of exosomes:

Procedures and protocols for exosomes production and isolation from WT and PTGFRN++ overexpressed HEK293 cells were established, as described in Dooley et al (1). Chemically defined media (CDM4PERMAb) was inoculated at  $0.3E+06$  viable cells per mL at the 10-25 L scale using WAVE bioreactors (GE Healthcare) and were maintained at  $37^{\circ}\text{C}$  and  $8.0\%$   $\text{CO}_2$ . Cells were grown for 9 days, and the cell density and viability of the cells was measured daily on a Vi-CELL XR cell counter (Beckman Coulter). For termination of the cell culture, cells were removed by centrifugation at  $6,000 \times g$  for 15 minutes. The cell pellet was discarded, and the clarified conditioned media was filtered using Sartopore  $0.8/0.45 \mu\text{m}$  MidiCaps (Sartorius), supplemented with  $\text{MgCl}_2$  to a final concentration of 1 mM, and treated with 20 U/mL Benzonase (Millipore) overnight at room temperature with gentle agitation. Nuclease treated media was concentrated 10X by tangential flow filtration using a SARTOFLOW benchtop system equipped with Pellicon 2 mini 1,000 NMWL polyethersulfone (PES) ultrafiltration cassettes (Millipore). Concentrated media was then subsequently loaded into 100 mL Quick-Seal Ultra-Clear tubes and centrifuged for 60 minutes at  $133,900 \times g$  at  $4^{\circ}\text{C}$  in a 45 Ti fixed-angle rotor in an Optima XE ultracentrifuge (Beckman Coulter). Finally, the crude exosome-containing pellets were resuspended in minimal volumes of sterile PBS for further processing.

For preparing larger scale batches, the resuspended crude pellets were adjusted to a final volume of 3 mL with sterile PBS and mixed with 9 mL of 60% iodixanol solution (OptiPrep, Sigma), which resulted in a final concentration of 45% iodixanol. This was then transferred to a 38 mL UltraClear tube (Beckman Coulter). Successive layers of lower density iodixanol solutions were carefully pipetted on top of the 45% layer: 9 mL of 30%, 6 mL of 23%, 6 mL of 18%, and 3 mL of PBS. These lower density solutions were prepared by diluting OptiPrep with a homogenization buffer (250 mM sucrose, 10 mM Tris-HCl, 1 mM EDTA, pH 7.4) to achieve the final indicated iodixanol vol/vol percentages. A density gradient was achieved by centrifuging at  $150,000 \times g$  for 16 hours at  $4^{\circ}\text{C}$  in a swinging-bucket SW 32 Ti rotor (Beckman Coulter). Exosomes were isolated from the interface between the PBS and 18% iodixanol layer by careful pipetting and transferred to a clean 38 mL UltraClear tube. An additional low speed spin at  $20,000 \times g$  for 30 minutes at  $4^{\circ}\text{C}$  was used to remove any contaminating actin and actin-binding protein species. The supernatant was filtered using a  $0.22 \mu\text{m}$  PVDF sterile filter, transferred to a clean 38 mL UltraClear tube, and centrifuged at  $133,900 \times g$  for 3 hours at  $4^{\circ}\text{C}$ . The final purified exosome pellet was resuspended in a minimal amount of sterile PBS, characterized, aliquoted, and frozen at  $-80^{\circ}\text{C}$  for long term storage.

### Radiolabeling of exosomes and PET imaging:

For zirconium (Zr) radiolabeling of PTGFRN++ exosomes, immediately prior to use, 1M HEPES buffer, pH 7.3 was mixed with  $^{89}\text{Zr}$ -oxalate (3D Imaging, Little Rock, AR) to prepare a 1:10 (v:v) labeling stock solution. The DFO conjugated exosomes were then added the  $^{89}\text{Zr}$ -oxalate labeling stock solution, and this labeling reaction mixture was then incubated at  $37^{\circ}\text{C}$  for 60 minutes. Following incubation, the labeling reaction mixture was purified using Zeba™ Spin Desalting Columns, 7K MWCO purification columns (ThermoFisher Scientific, MA) with 1X phosphate buffered saline (PBS) as the eluent for purification. Radioactive fractions (500  $\mu\text{L}$ ) were collected, analyzed via SEC-HPLC (Column: TSK gel 3000 – 30 cm x 7.8, 5  $\mu\text{m}$ ; Buffer: 1X PBS;

Rate: 1 mL/min), and all positive [<sup>89</sup>Zr]DFO-labeled EV fractions were pooled to obtain the final product for injection.

For pharmacokinetic assessment in mouse, a single bolus intravenous injection (tail vein, IV) of [<sup>89</sup>Zr]-DFO-exosomes (100mCi/ <200ml) was administered under anesthesia using a 26G needle attached to a 1ml syringe and the mice then placed into the bed of a micro-PET camera. In this instance, a dynamic 60-minute acquisition was acquired followed by a short CT scan to allow for co-registration of PET and CT images. PET data acquired was histogrammed using by Fourier rebinning and the PET images were then reconstructed using an ordered subset expectation maximum algorithm (OSEM 2D) with corrections for detector normalization, deadtime, randoms, and attenuation based on the CT scan to provide the images.

### Gene expression analysis by RT-qPCR:

For in vitro experiments and analysis, cells were lysed with Cells to Ct 1-step Taqman Kit (Thermo Fisher) according to manufacturer's instructions. mRNA expression was measured using TaqMan Fast Virus 1-step master mix (Thermo Fisher) and QuantStudio™ 3 & 5 Real-Time PCR System (Thermo Fisher Scientific). Ct values for all target genes were normalized to Ct values of the housekeeping gene, GAPDH. For in vivo liver, spleen and tumor samples, tissues were collected in RNA later (Thermo Fisher) solution and stored overnight at 4°C. The tissues were placed in 1 mL of QIAzol lysis reagent and homogenized mechanically with a bead rupture. Total RNAs were isolated using RNeasy Lipid Tissue Mini Kit (ThermoFisher Scientific) following manufacturer's instructions and quantified using NanoDrop (ThermoFisher Scientific). 500 ng of total RNAs were used to generate cDNA using SuperScript IV VILO Master Mix (ThermoFisher Scientific). Target genes expression levels were assessed by RT-qPCR using TaqMan Fast Virus 1-step master mix (Thermo Fisher) and QuantStudio™ 3 & 5 Real-Time PCR System (Thermo Fisher Scientific). Ct values for all target genes were normalized to Ct values of the housekeeping gene, RPS13.

Probes used (Thermo Fisher):

|              |               |
|--------------|---------------|
| Human STAT6  | Hs00598625_m1 |
| Human GAPDH  | Hs02786624_g1 |
| Mouse Stat6  | Mm01160477_m1 |
| Mouse RPS13  | Mm00850011_g1 |
| Mouse Arg1   | Mm00475988_m1 |
| Human CD163  | Hs00174705_m1 |
| Human STAT1  | Hs01013996_m1 |
| Human STAT5B | Hs00560026_m1 |
| Human STAT4  | Hs01028017_m1 |
| Human STAT5B | Hs00234181_m1 |
| Human STAT3  | Hs00374280_m1 |

### WES (Protein Simple WES) Analysis:

Human monocytes were negatively enriched from whole blood using RosetteSep human monocyte enrichment cocktail (STEMCELL Technologies). The enriched cells were differentiated for 6 days with RPMI/10%FBS/M-CSF media for M2 MDMs or RPMI/10%FBS/GM-CSF media for M1 MDMs and then polarized overnight with 20 ng/mL of IL-4/IL-10/TGF $\beta$  in RPMI/10%FBS/M-CSF medium for M2 MDMs and RPMI/10%FBS/GM-CSF with 20 ng/mL of IFN- $\gamma$  and LPS for M1 MDMs. The adherent macrophage cells were scraped, plated, and further polarized overnight in a 96-well flat bottom TC plate at 100K cells/well. The next day, the cells were treated with the listed compounds. The first experiment was a single time point of 4 days and the second experiment was dose duration of 1, 2, 3, 5, 7, and 10 days. Treated macrophages were lysed with RIPA buffer (ThermoFisher Scientific) plus 1X protease/phosphatase inhibitor (Sigma-Aldrich) at the end of each time point. Sample cell lysates were further diluted to stock concentration of 500  $\mu$ g/mL in RIPA buffer for Western analysis using WES method (Protein Simple). Stock samples were mix to a ratio of 1:4 (1-part Protein Simple master mix: 4-part lysates), denatured at 95°C for 10 minutes, and then loaded at 3  $\mu$ L/well into row A of the WES 12-230 kDa pre-filled plate (Protein Simple). Wells in row B were filled with 10  $\mu$ L/well of SuperblockT20 blocking buffer (ThermoFisher Scientific). Primary antibodies, Stat6 #5397S, phospho-Stat6 (Tyr641) #9361S and beta-Actin #8457S (Cell Signaling) were diluted at 1:40 (Stat6), 1:30 (p-Stat6) and at 1:100 (beta-Actin) in SuperblockT20 buffer and 10  $\mu$ L/well were loaded into appropriate well in row C. Wells in row D were loaded with 10  $\mu$ L/well of HRP-conjugated secondary antibodies (Protein Simple). Wells in row E were filled with 15  $\mu$ L/well of chemiluminescent substrate SuperSignal West Femto (ThermoFisher Scientific). Lastly, the wash buffer wells were filled with wash buffer and the plate spun down at 2000 rpm before running the plate in the WES instrument (Protein Simple). Protein expressions were quantified (Stat6 to loading control beta-Actin) and percentage protein knockdown assessed.

### **CD11b enrichment:**

To enrich for CD11b cells from CT26 tumors, two tumors were pooled together to make one tumor sample. Tumors were dissociated with mouse Tumor Digestion Kit (Miltenyi Biotec) according to manufacturer's instructions. This solution was then centrifuged in the same digestion tubes at 500g for 1 minute, resuspended in the same digestion solution, and passed through a 70  $\mu$ m cell strainer. Cells were then washed once with PBS + 2% FBS and resuspended in 500ul of robosep buffer. EasySep Mouse CD11b Positive Selection Kit II (STEMCELL Technologies) was then used to enrich for CD11b positive cells, according to manufacturer's protocol. These cells were then used for downstream analysis such as RNA isolation and flow cytometry.

### **Flow Cytometry:**

Tissues and tumors were dissociated using mouse tumor dissociation kit and mouse liver dissociation kit using genleMACS (Miltenyi Biotec), according to manufacturer's instructions. This solution was then centrifuged in the same digestion tubes at 500g for 1 minute, resuspended in the same digestion solution, and passed through a 70  $\mu$ m cell strainer, and resuspended in PBS. Cells were then stained with Live/Dead stain dye (IR885) and were then blocked with Fc block (eBioscience). Samples were then incubated with a master mix of flow antibodies, washed with

flow cytometry wash buffer. Data were acquired using the CytoFLEX LX flow cytometer (Beckman Coulter) and analyzed with the CytExpert flow cytometry software (Beckman Coulter).

Antibodies used for flow cytometry experiments:

| Antibody | Fluorochrome | Clone         |
|----------|--------------|---------------|
| CD45     | BUV395       | 30-F11        |
| CD11b    | BUV737       | M1/70         |
| CD11c    | BV421        | N418          |
| I/A-I/E  | BV510        | M5/114.15.2   |
| Ly6G     | BV605        | 1A8           |
| CD3      | BV711        | 17A2          |
| F4/80    | BV785        | BM8           |
| CD49b    | FITC         | DX5           |
| CD19     | PE           | 1D3/CD19      |
| Ly6C     | PE-Cy7       | HK1.4         |
| CD45     | BUV395       | 30-F11        |
| CD11b    | BUV737       | M1/70         |
| CD11c    | BV421        | N418          |
| I/A-I/E  | BV510        | M5/114.15.2   |
| Ly6G     | BV605        | 1A8           |
| F4/80    | BV785        | BM8           |
| CD86     | FITC         | GL-1          |
| CD115    | PE           | AFS98         |
| CD206    | APC          | C068C2        |
| Ly6C     | APC-Fire750  | HK1.4         |
| CD8      | BUV737       | 53-6.7        |
| CD4      | BV421        | RM4-5         |
| CD3      | BV510        | 17A2          |
| CD19     | BV605        | 6D5           |
| CD49b    | BV711        | HM $\alpha$ 2 |
| CD25     | BV785        | PC61          |
| Foxp3    | APC          | FJK-16s       |

### Immunohistochemistry:

For liver tissue, the right lobe was collected, fixed in 10% NBF for 24 hours, cut into slices (no more than 5mm thickness) and subsequently embedded in paraffin (Histowax, Histolab, Sweden). Paraffin embedded tumors were cut onto slides with a thickness of 5  $\mu$ m. Slides were baked for 15mins at 60°C, deparaffinized in xylene, and rehydrated via graded alcohols. Hematoxylin-Eosin (H&E) staining was performed using standard methods. For tumor cell counts,

observations were made by manual Scoring (<20% tumor cells remaining with tumor cell morphology changing and more immune cells infiltration were called Partial responders (PR); A complete lack of tumor cells were called Complete Responders (CR); >20% tumor cells remaining were called Non-Responders (NR). For tumor cell analysis by Halo Imaging Analysis Platform, tumor and stromal cell classifier methods were used for analysis. The primary antibodies for CD8 (rabbit monoclonal; Abcam EPR21769 1:2000) and FoxP3 (rabbit monoclonal; Cell Signaling D6O8R 1:2000) were used and fluorescence staining was done by anti-rabbit HRP polymer (Cell Signaling-#8114), followed with Tyramide signal application kit (AKOYA: NEL741001KT and NEL744001KT). Cell nuclei were counterstained and mounted with (VECTASHIELD H-2000). Slides were scanned with Olympus VS120, image analysis with Indica lab software.

For ASO detection in macrophages, primary antibodies used are as follows: iNOS(abcam15323) 1:1000; Stat6(abcam217998) 1:2000; ASO (28D12) 1:1000; IBA1(ab178847)1:4000 with an anti-rabbit HRP polymer (Cell Signaling-#8114) and followed with Tyramide signal application kit (AKOYA: Fluorescein NEL741001KT TSA plus Cyanin3 NEL744001KT; TSA Plus Cyanine5 NEL745001KT and TSA biotin SAT700001EA). Cell nuclei were counterstained and mounted with (VECTASHIELD H-2000). Slides were scanned with Olympus VS120, image analysis with Indica lab software FISH-IF.

Major pathological responses (MPRs) are defined as tumors with less than 10% of viable tumor remaining. For semiquantitative scoring of inflammation, histopathology of liver tumors was detected by H&E examination and included multiple focal to coalescing nodules effacing the healthy hepatic parenchyma. Neoplastic nodules were composed of neoplastic cells with various degrees of malignant cellular features (anisocytosis, anisokaryosis, 1-4 nuclei, mitotic figures), peritumoral or/and intratumoral mononuclear inflammation and tumor core necrosis. Tumor-associated inflammation was subjectively scored by a pathologist from 0 to 3 according to the following criteria: 0, absence of inflammatory cells associated with neoplastic nodules; 1 (mild), peritumoral inflammation with occasional intratumoral inflammatory cells in less than 50% of neoplastic nodules; 2 (moderate), frequent but low to high numbers of peritumoral and intratumoral inflammatory cells mixed with neoplastic cells in most neoplastic nodules; 3 (severe) neoplastic nodules are composed of large numbers of inflammatory cells effacing and replacing neoplastic cells in most neoplastic nodules across the whole liver section.

### **Single Cell RNA Sequencing:**

**Tumors were dissociated using mouse tumor dissociation kit (Miltenyi Biotec) using genleMACS (Miltenyi Biotec),** according to manufacturer's instructions. This solution was then centrifuged in the same digestion tubes at 500g for 1 minute, resuspended in the same digestion solution, and passed through a 70 µm cell strainer, and resuspended in PBS. CD45 positive cells were enriched from dissociated cells with EasySep™ Mouse CD45 Positive Selection Kit (Stem Cell Technologies), according to manufacturer's instruction. Cell suspensions were adjusted to 1000 cells/ul and were loaded 8,300 cells into the 10X Chromium Next GEM Single Cell 3' Reagent Kit v3.1 (10x Genomics) to target 5,000 cell recovery. All subsequent steps including GEM generation, barcoding, cDNA amplification, and 3' gene expression library construction were performed by following the standard manufacturer's protocols.

10x Genomics Cell Ranger pipeline (v.1.2) was utilized to perform de-multiplexing raw base call (BCL) files, alignment (mapped to the 10X reference for mm10), filtering, barcode counting, and UMI counting with the default parameters (58). In addition, the cellranger aggr pipeline was employed to combine data from multiple samples into an experiment-wide feature-barcode matrix for further data analysis. Data analysis and visualization were performed with the Seurat package (v.3.1.5) (59) in R (v.4.0.1) (60). In brief, cells in the digital count matrix were first filtered with the cutoffs that both at least 200-9,000 genes were detected and the mitochondrial read rate < 10%. Next, the remaining data matrix was normalized by the log transformation and then scaled to 10,000 transcripts per cell. Variable genes were identified with the FindVariableGenes() function with the default parameters. Principal component analysis (PCA) was performed, and the top 20 principal components (PCs) were selected for the FindNeighbors() function. Clusters were identified with the FindClusters() function with a clustering resolution set to 0.5. To visualize the data set, the Uniform Manifold Approximation and Projection (UMAP) dimensional reduction technique was utilized. Gene signatures associated with each cluster were identified using the FindAllMarkers() function with the parameters of min.pct = 0.25 and logfc.threshold = 0.25. To annotate the cell types, we utilized multiple canonical marker genes that have been previously described in the literature.

These datasets are available in the National Center for Biotechnology Information Gene Expression Omnibus (GEO) repository, accession number: GSE174068

## SUPPLEMENTARY FIGURE LEGENDS

### Figure S1: Characterization of WT and PTGFRN<sup>++</sup> exoASO-STAT6, STAT6 ASO specificity, and exosomes mediated preferential delivery of ASOs to macrophages.

(A) Representative cryogenic electron microscopy image of WT exosomes. (B) Representative diameter size analysis (nm) of WT and PTGFRN<sup>++</sup> exosomes loaded with STAT6 ASO-2039 and ASO-2065, and unloaded WT and PTGFRN<sup>++</sup> exosomes, as measured by Nanoparticle Tracking Analysis (NTA). (C) Immunoblots for characterization of WT and PTGFRN<sup>++</sup> exosomes: Total protein (PTGFRN ~120kDa), ALIX, Syntenin-1, TSG101, CD9, CD63 and CD81. (D) Normalized gene expression analysis by RT-qPCR of STAT6, STAT1, STAT3, STAT4, STAT5A and STAT5B in A549 cells transfected with 50 nM of STAT6 ASO-2065, STAT6 ASO-2039 or Scramble ASO. (E) Intra-tumoral biodistribution of Cy5 labelled exoASO STAT6-2039 (WT) in the indicated immune cell populations. 1 hr post single IT dose (4µg) of exoASO STAT6-2039 (Cy5), mean Fluorescent Intensity (MFI) of Cy5 was measured and plotted as histograms from the tumors of Balb/c mice bearing subcutaneous CT26 tumors. (F) Reduction in protein expression of STAT6 as measured by WES in the livers of mice from (Fig. 1H). (G) Differential uptake of pHrodo dye labeled exoASO-STAT6-2039 (PTGFRN<sup>++</sup>) in primary human monocyte derived M1 vs M2 macrophages (MDMs), over time, as measured by quantifying the Average Object Integrated Intensity by Incucyte ZOOM software. (H) Changes in uptake kinetics of pHrodo dye labeled exoASO-STAT6-2039 (PTGFRN<sup>++</sup>) over time in M2 and M1 MDMs, untreated, or pre-treated with either 10µM Cytochalasin D, 10µg/mL Poly (I), or 500µg/mL Fucoidan, as measured by quantifying the Average Object Integrated Intensity by Incucyte ZOOM software. (I) Protein expression of total STAT6 and phosphorylated STAT6 as measured by WES, in M2 and M1 MDMs. Data are mean ± s.d. (B, D, G, H, I) and ± s.e.m. (F). \*P<0.05, \*\*\*P<0.001, \*\*\*\*P<0.0001, ns: not significant. Two-way ANOVA with Sidak's multiple comparisons test (D), One-way ANOVA with Sidak's multiple comparisons test (F).

### Figure S2: exoASO-STAT6-2039 and 2065 induce equal reduction of STAT6 expression that leads to reprogramming of M2 macrophages.

(A) Normalized gene expression analysis by RT-qPCR of similarity of STAT6 mRNA knockdown efficiency in M2 MDMs treated for 48h with either exoASO STAT6-2039 (WT), exoASO STAT6-2039 (PTGFRN<sup>++</sup>), or exoASO Scramble. (B) Normalized gene expression analysis by RT-qPCR of changes in STAT6 mRNA expression in M2 MDMs treated over the course of 7 days with exoASO STAT6-2065 (PTGFRN<sup>++</sup>), Free STAT6 ASO-2065, or exoASO Scramble. Each line represents a separate dose, and STAT6 mRNA expression was analyzed at 1, 2-, 3-, 5- and 7-days post treatment. (C) Reduction in protein expression of STAT6 as measured by WES, in M2 MDMs treated over the course of 14 days, treated with 2.5µM of either exoASO STAT6-2065 (PTGFRN<sup>++</sup>), Free STAT6 ASO-2065, or exoASO Scramble, normalized to housekeeping gene Beta Actin. (D) Heat maps of modulation of genes from M1 and M2 signature analysis from Martinez et al (31), from Nanostring data from (Fig. 2D). (E) Expression and modulation of STAT3, STAT1, STAT4, STAT5a and STAT5b from nanostring gene expression analysis from (Fig. 2D). (F) Cytokine analysis depicting modulation of IL12p40 using a multiplex flow cytometry assay, of M2 MDMs treated for 48h (24h with LPS) with either exoASO STAT6-2039 (WT), Free STAT6 ASO-2039, or exoASO Scramble. One representative donor of four is shown. (G) Cytokine analysis depicting fold change modulation of



compounds vs untreated control, of IL12p40, TNF $\alpha$ , CCL17, IL23 and IL1 $\beta$  using a multiplex flow cytometry assay, in M2 MDMs treated for 48h (24h with LPS) with 2.5 $\mu$ M of either exoASO STAT6-2039 (WT), Free STAT6 ASO-2039, or exoASO Scramble. Fold change is calculated across 4 donors. **(H)** Normalized gene expression analysis by RT-qPCR of changes in STAT6 and CD163 mRNA expression in M2 MDMs treated for 48h with either exoASO STAT6-2065 (WT), exoASO STAT6-2039 (WT), or exoASO Scramble. One representative donor of 2 graphically presented. IC50 values across 2 donors for STAT6 and CD163 shown. **(I)** Cytokine analysis depicting fold change modulation of compounds vs untreated control, of IL12p40, TNF $\alpha$ , IL23 and IL1 $\beta$  using a multiplex flow cytometry assay, in M2 MDMs treated for 48h (24h with LPS) with 2.5  $\mu$ M of either exoASO STAT6-2039 (WT), exoASO STAT6-2065 (WT), or exoASO Scramble. Fold change is calculated across 3 donors. Data are mean  $\pm$  s.d. \*P<0.05, \*\*\*P<0.001, \*\*\*\*P<0.0001. One-way ANOVA with Tukey's multiple comparisons test **(E, F)**.

**Figure S3: exoASO-STAT6 treatment results in a potent monotherapy anti-tumor response in CT26.**

**(A)** Individual mice tumor growth volumes of Balb/C mice bearing subcutaneous CT26 tumors, injected intratumorally (TIW) with PBS, exoASO Scramble (4  $\mu$ g), Free STAT6 ASO-2039 (4  $\mu$ g), exoASO STAT6-2039 (WT) (4 $\mu$ g), intra peritoneally (BIW) with anti-PD-1 monoclonal antibody (10 mg/kg) and anti-CSF1R (15 mg/kg), and a combination of exoASO STAT6-2039 (WT) (4  $\mu$ g) or Free STAT6 ASO-2039 (4 $\mu$ g) with anti-PD-1 monoclonal antibody (10 mg/kg), n=10 mice per group, data from **(Fig. 3A)**. **(B)** Tumor growth volumes of Balb/C mice bearing subcutaneous CT26 tumors, injected intratumorally or intravenously (TIW) with PBS, exoASO Scramble (12  $\mu$ g), and exoASO STAT6-2039 (PTGFRN++) (12  $\mu$ g), n=9 mice per group. **(C)** Tumor growth rates from data in **(B)** and flow cytometry analysis of the comparison of % Cy5 positive (exoASO administered only) TAMS within CT26 tumors, 1 hour post single IT (4  $\mu$ g) or IV (8  $\mu$ g) dose of Cy5 labelled exoASO STAT6-2039 (WT). **(D)** Tumor growth volumes of Balb/C mice bearing subcutaneous CT26 tumors, injected intratumorally with PBS (TIW, 2wk), exoASO STAT6-2039 (PTGFRN++) (6 $\mu$ g) (BIW, 3wk) or (TIW, 2wk) or exoASO Scramble (6 $\mu$ g) (TIW, 2wk), n=10 mice per group. **(E)** Tumor growth rates from data in **(D)**. **(F)** Normalized gene expression analysis by RT-qPCR of changes in *Stat6* mRNA expression over time (1 day-7days), from CD11b-enriched fractions of CT26 tumors injected once intratumorally with either exoASO Scramble or exoASO STAT6-2039 (PTGFRN++) (6 $\mu$ g). Each timepoint is normalized to exoASO Scramble for that respective timepoint. Only one exoASO Scramble timepoint shown for graphical purpose. **(G)** Tumor growth rates from data in **(Fig. 3D)**. **(H)** Confirmation of CD8 and CD4 T cell depletion from **(Fig. 3F)** by flow cytometry. **(I)** Tumor growth volumes of Balb/C mice bearing subcutaneous CT26 tumors, injected intratumorally (TIW, 2 weeks) with PBS, exoASO Scramble (4 $\mu$ g) or 1E11 WT or PTGFRN++ exoASO STAT6-2039 (5.9  $\mu$ g and 3.4  $\mu$ g respectively). Data are mean  $\pm$  s.e.m. \*P<0.05, \*\*P<0.01, \*\*\*P<0.001, \*\*\*\*P<0.0001. One-way ANOVA with Tukey's multiple comparisons test **(C, E, G, H)**, Unpaired two-tailed student's t test **(C)**. CR: complete response, ns: not significant.

**Figure S4: Effective reprogramming of the tumor microenvironment by exoASO-STAT6 in CT26.**

(A) Flow cytometry analysis from (Fig 4A-E) from pre and post CD11b enriched tumor fractions, showing confirmation and quantification of CD11b enrichment from tumors. (B) Flow cytometry analysis of % of macrophages within CD45+ cells or total live cells, % T cells within total live cells and % CD8 T cells within total live cells, from (Fig. 4F). (C) tSNE plots from scRNA seq data from (Fig. 4G), of intra tumoral cells from exoASO Scramble or exoASO STAT6 group, to identify individual immune cell populations. (D) Quantification of individual immune cell populations from (C), as depicted by proportion (percentage) of individual cell population over total number of cells. (E) Violin plots of the expression of *Gzmb*, *Lag3*, *Id2* and *Il7r* from the CD8 T cell populations from scRNA seq data in (Fig. 4G). Data are mean  $\pm$  s.e.m. \*P<0.05, \*\*P<0.01, \*\*\*P<0.001. Unpaired two-tailed student's t test (E).

**Figure S5: Potent target gene knockdown and anti-tumor response by systemic administration of exoASO-STAT6.**

(A) Representative H&E sections of Hepa1-6 tumors from (Fig. 5A-J), showing quantification of tumor cells by Halo Imaging Analysis Platform. (B) H&E stained sections of livers from (Fig. 5A-J), showing infiltration of immune cells in the non-responder mice that were treated with exoASO STAT6-2039 (PTGFRN++). (C) Percentage (%) of tumor cells as calculated by Halo Imaging Analysis Platform from H&E stained sections of livers of C57Bl/6 mice bearing orthotopic Hepa1-6 tumors in the liver, injected intravenously with exoASO-Scramble (12  $\mu$ g) (TIW, 2wk) or exoASO-STAT6-2039 (PTGFRN++) (12  $\mu$ g) (TIW, 2wk), or anti-PD1 (10 mg/kg) (BIW), or a combination of exoASO-STAT6-2039 (PTGFRN++) (12 $\mu$ g) (TIW, 2wk) and anti-PD1 (10 mg/kg) (BIW) . Representative gross images of whole Hepa1-6 tumor livers of the listed groups at study end point are shown. (D) Representative H&E stained sections of Hepa1-6 tumors from (C). (E) Histopathological scoring and analysis of intra-tumoral inflammation from H&E stained sections of Hepa1-6 tumors from (C). (F) Representative images and quantification of STAT6 expression in whole tumor, from Hepa1-6 tumor bearing animals from (Fig. 5A-J), quantification was performed using Halo Imaging Analysis Platform. (G) Heat map depicting modulation of pathway scores of data in (Fig. 5E) as calculated by nSolver Analysis Software. (H) Pathway score analysis of data in (Fig. 5E) as calculated by nSolver Analysis Software, of Interferon Signaling. (I) Changes in body weight over time for all groups from Hepa1-6 tumor bearing animals from (Fig. 5A-J). Sham mice underwent the same inoculation procedures as experimental mice and were used as no-tumor controls. (J) Quantification of serum liver enzyme levels of aspartate aminotransferase (AST) and alanine aminotransferase (AST) at study end point from Hepa1-6 tumor bearing animals from (Fig 5A-J). TIW: 3x a week, BIW: 2x a week. Data are mean  $\pm$  s.e.m. \*P<0.05, \*\*P<0.01, \*\*\*P<0.001, \*\*\*\*P<0.0001. One-way ANOVA with Dunnett's multiple comparisons test (C), One-way ANOVA with Tukey's multiple comparisons test (F, H).

**Figure S6: STAT6 gene signature correlates with poor disease prognosis in HCC.**

(A) Box plot of the relative expression of the STAT6 gene signature across TCGA indications. (B) Kaplan-Meier curves of overall survival (OS) probability in bladder cancer, ovarian cancer, stomach adenocarcinoma, sarcoma and renal cell carcinoma (RCC), based on analysis of patients with high or low STAT6 macrophage gene signature. Results were generated using Kaplan-Meier

Plotter, log-rank Mantel-Cox test. **(C)** Kaplan-Meier curves of overall survival (OS) probability in HCC, based on analysis of patients with high or low STAT6 macrophage gene signature. Patient population was segregated into CD8 T cell enriched and non-enriched analysis based on cellular content. Results were generated using Kaplan-Meier Plotter, log-rank Mantel-Cox test. **(D)** Kaplan-Meier curves of overall survival (OS) probability in HCC, based on analysis of patients with high or low IL4 expression. Patient population was segregated into CD8 T cell non-enriched and macrophage enriched analysis, based on cellular content. Results were generated using Kaplan-Meier Plotter, log-rank Mantel-Cox test.

# Supplementary Figure 1

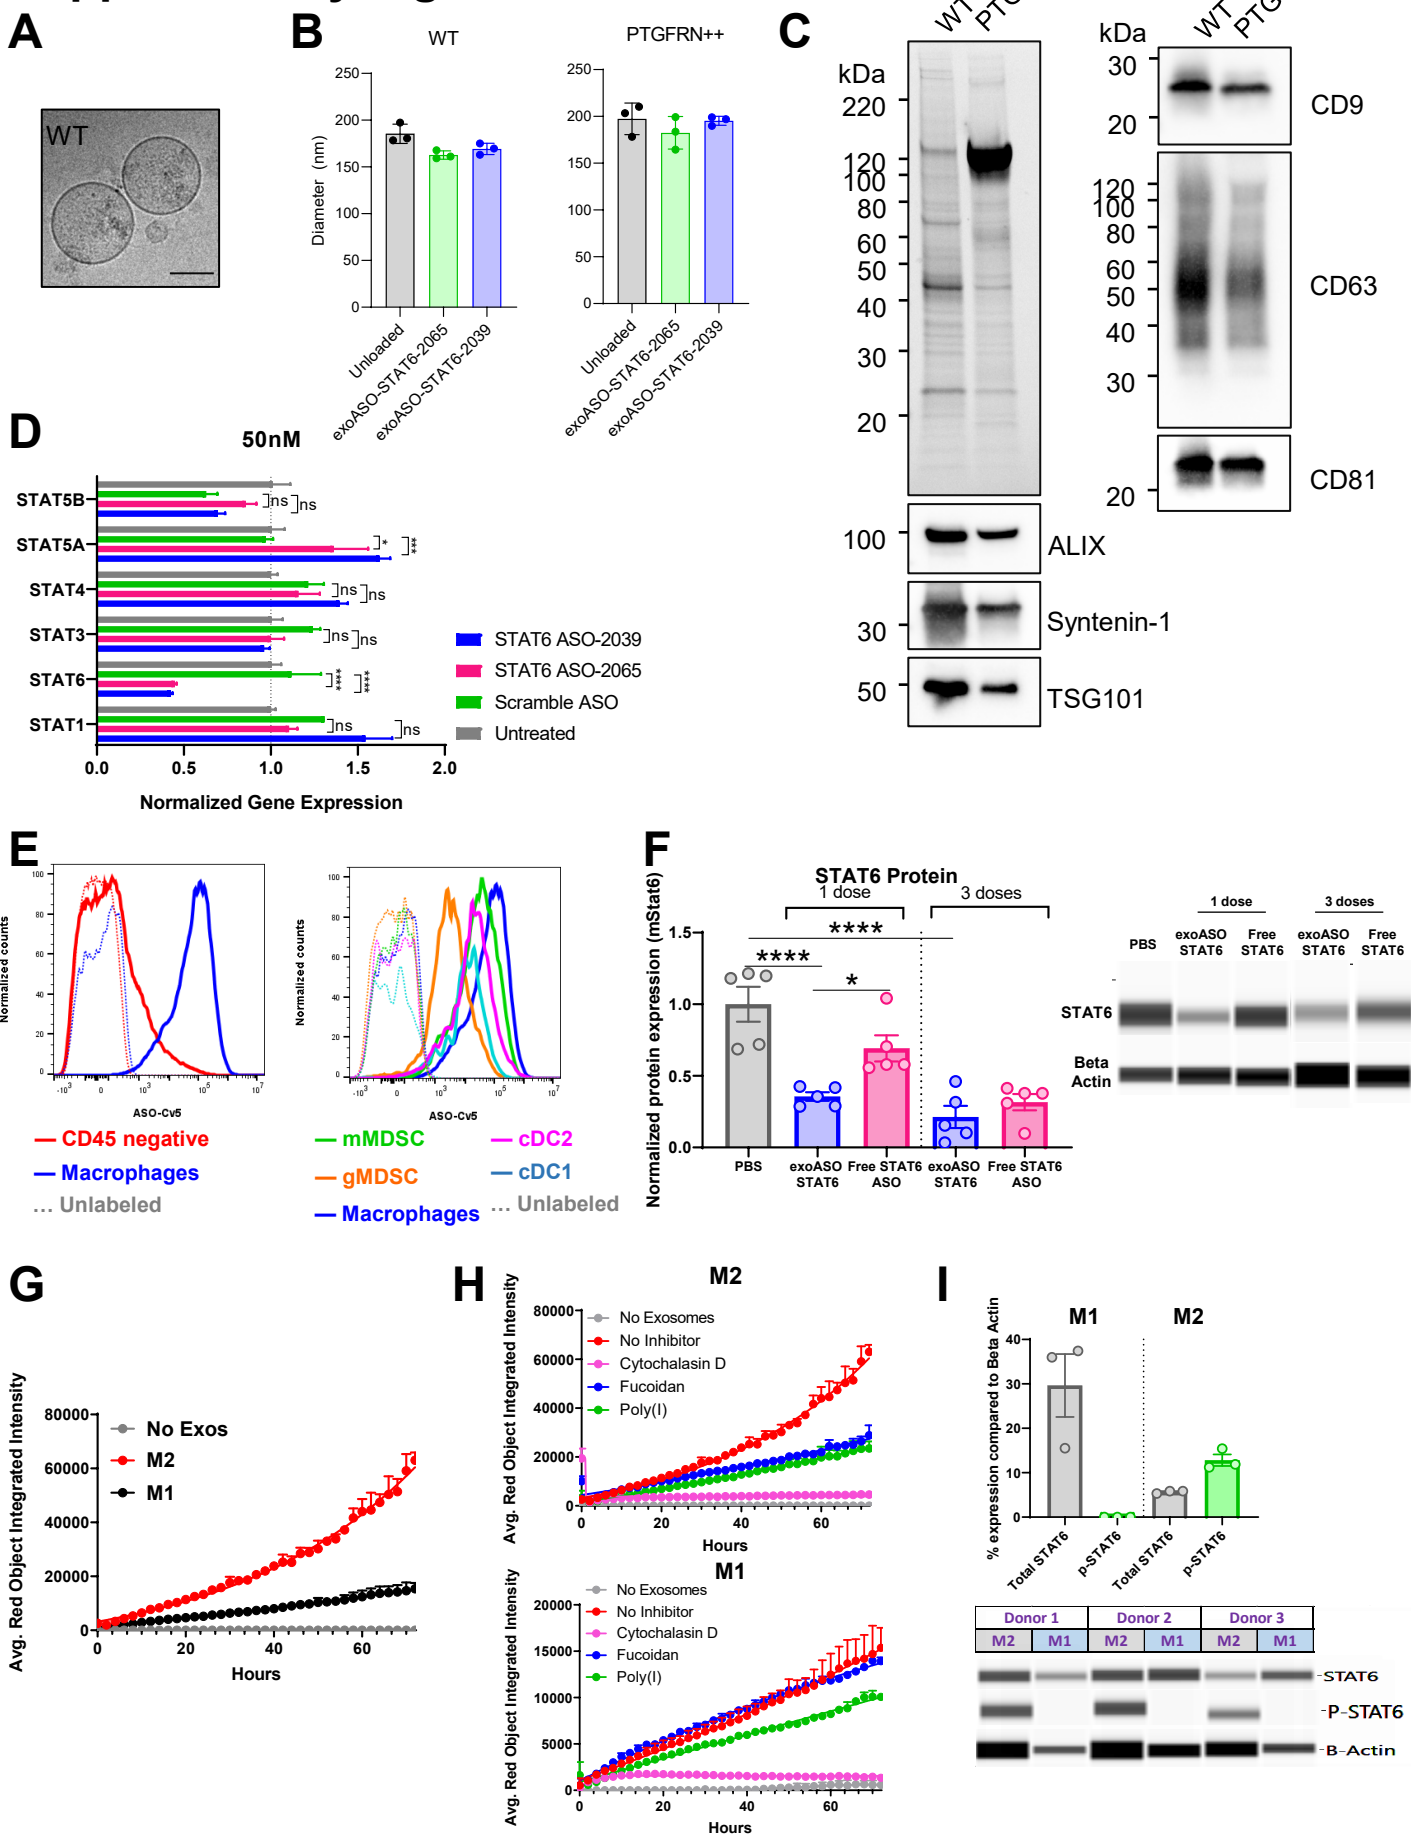

# Supplementary Figure 2

## A

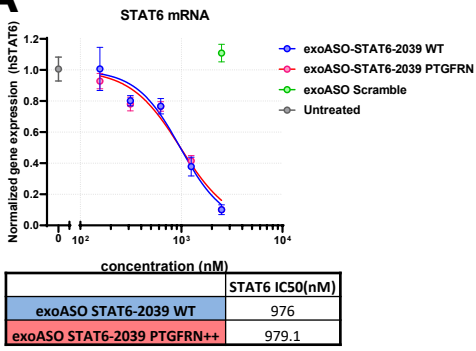

## B

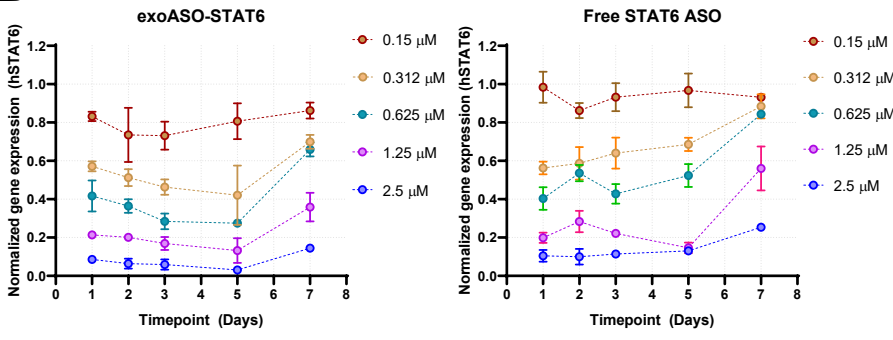

## C

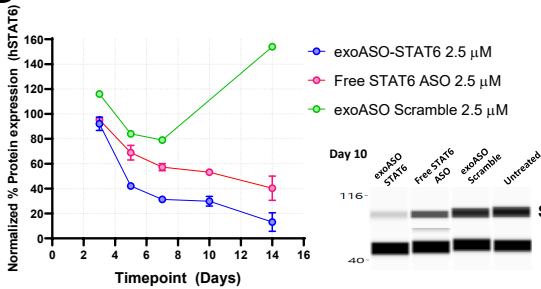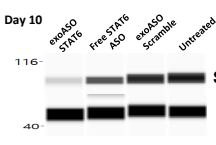

## D

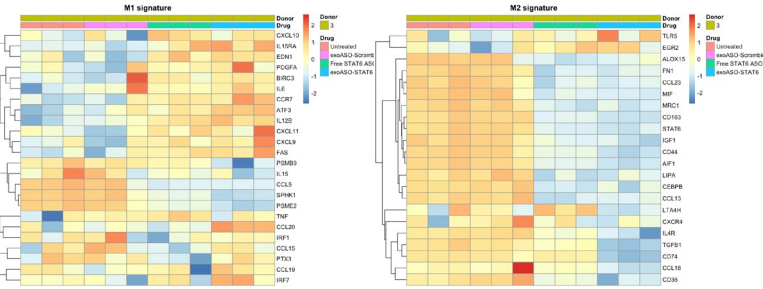

## E

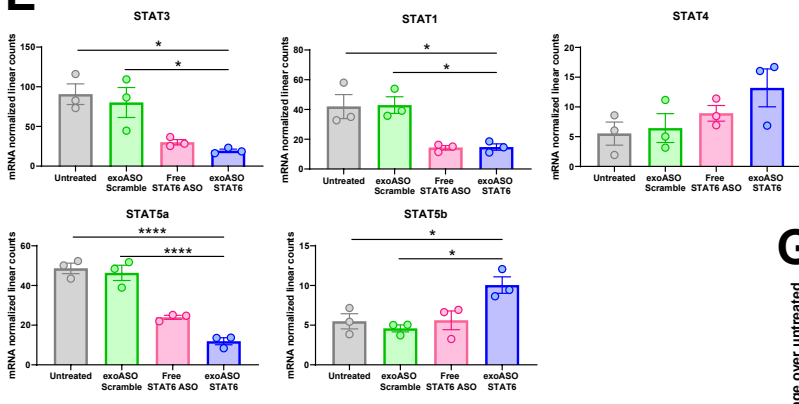

## F

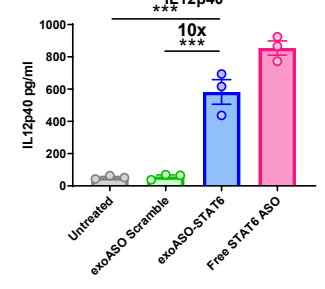

## G

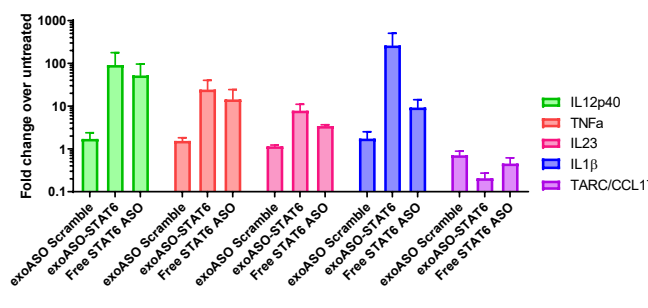

## H

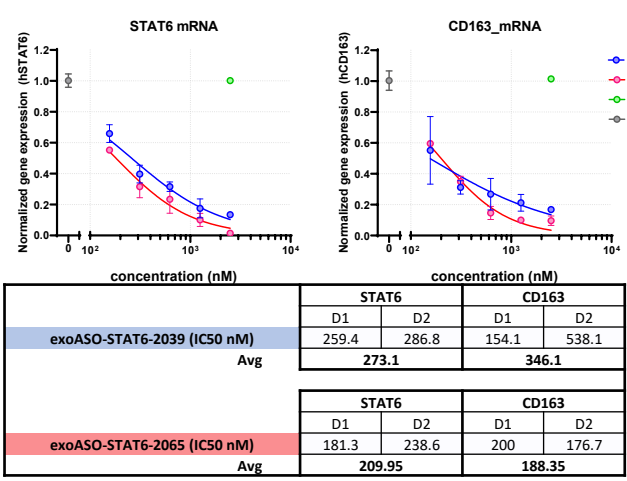

## I

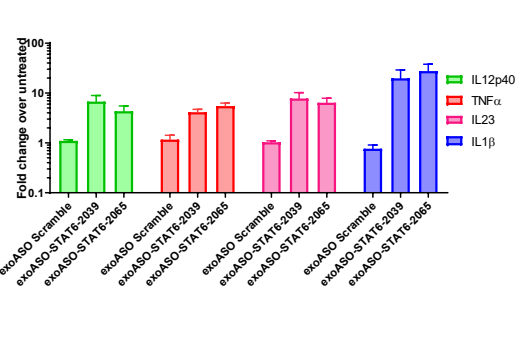

# Supplementary Figure 3

## A

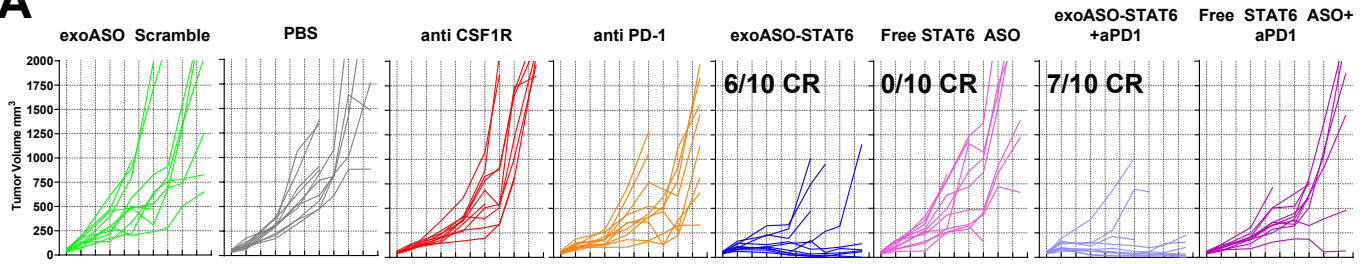

## B

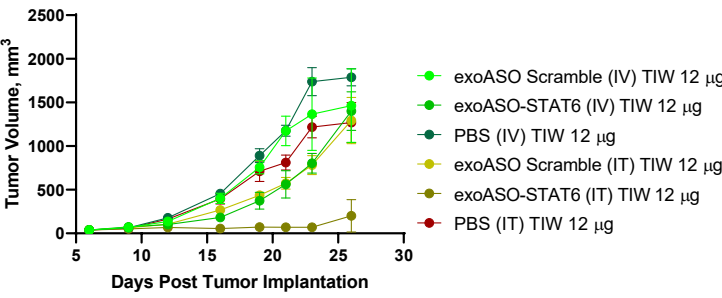

## C

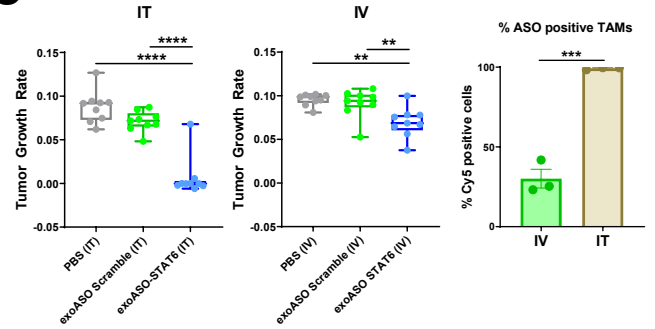

## D

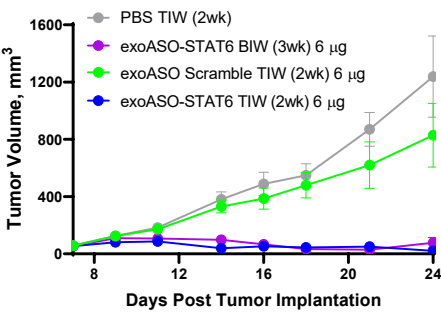

## E

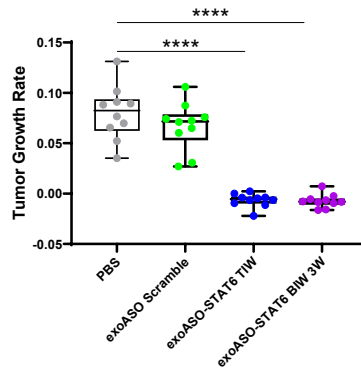

## F

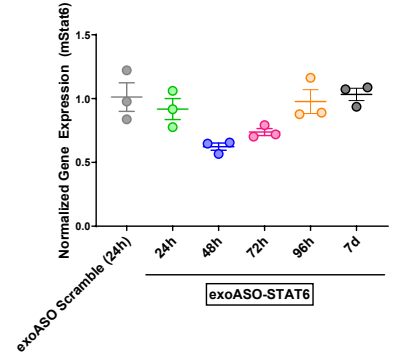

## G

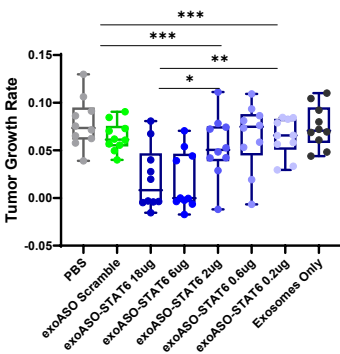

## H

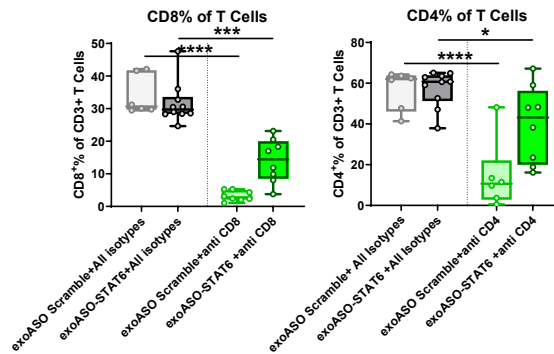

## I

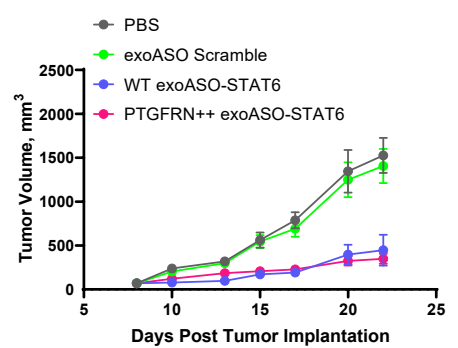

# Supplementary Figure 4

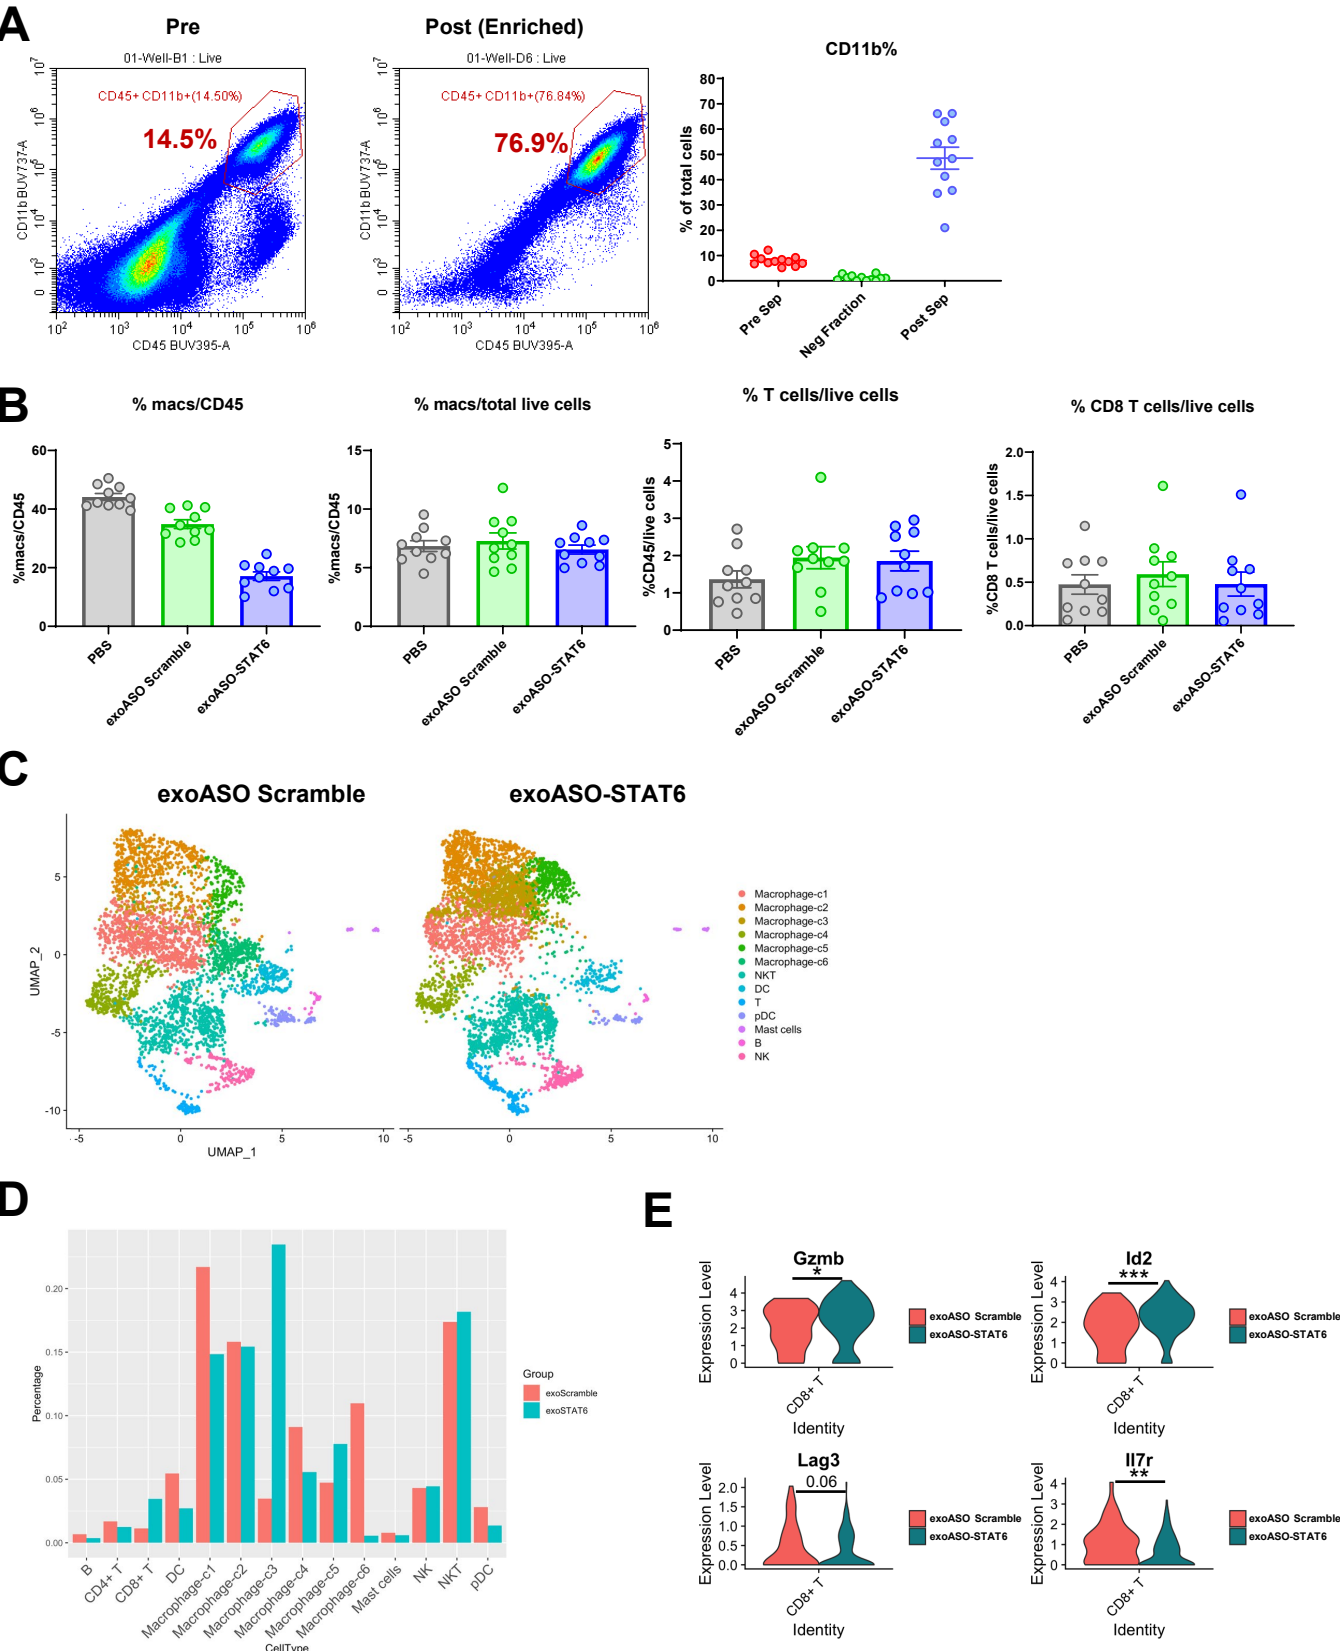





# Supplementary Figure 6

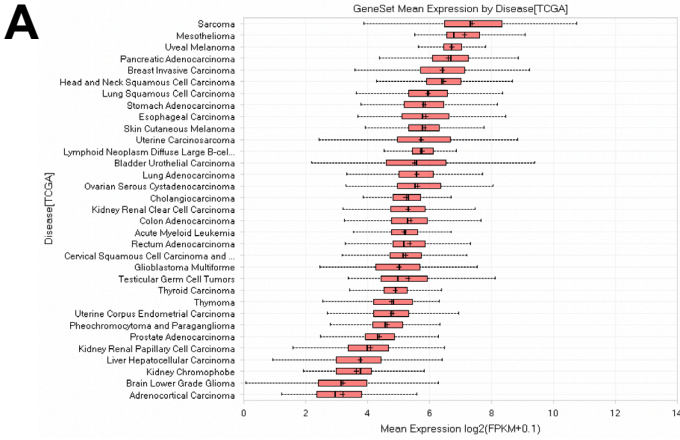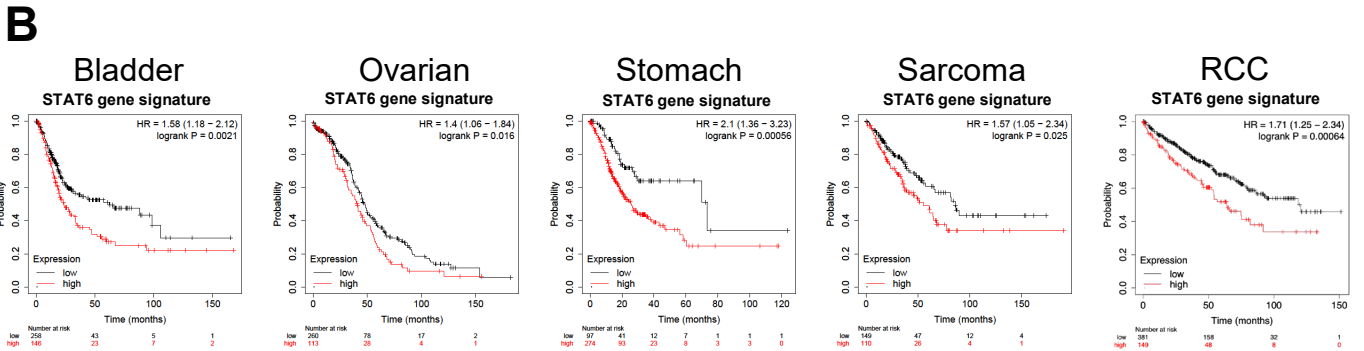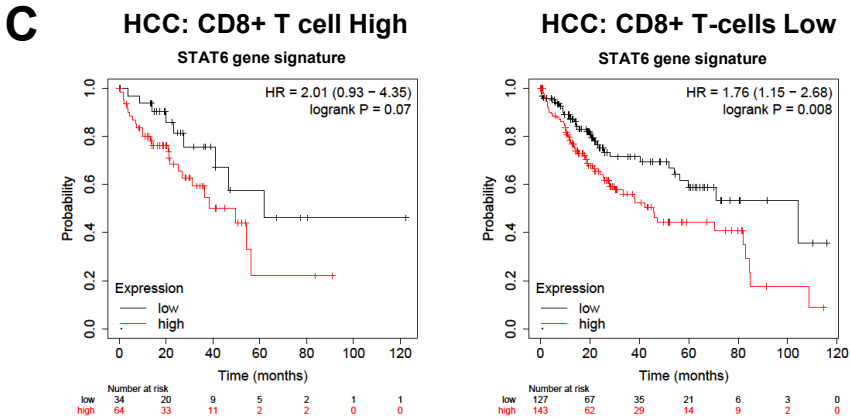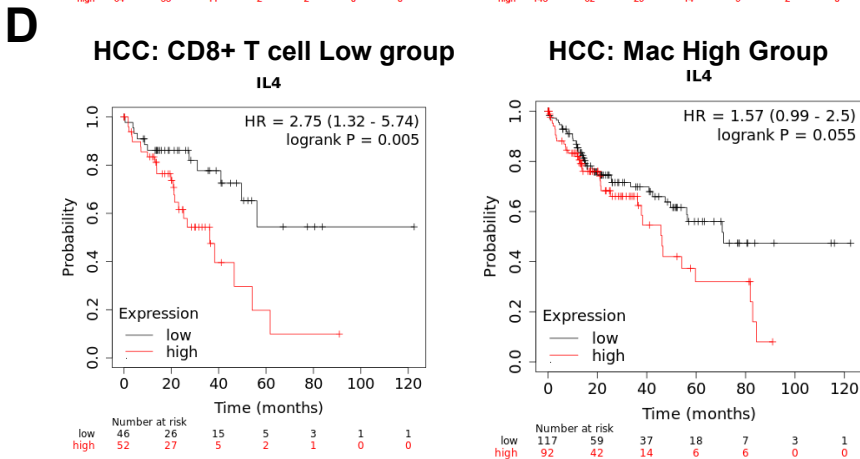

## **SUPPLEMENTARY TABLES**

**TABLE S1**

|    | Macrophage cluster 1 | Macrophage cluster 2 | Macrophage cluster 3 | Macrophage cluster 4 | Macrophage cluster 5 | Macrophage cluster 6 | NK        | NKT       | DC        | T        | pDC      | Mast cells | B             |
|----|----------------------|----------------------|----------------------|----------------------|----------------------|----------------------|-----------|-----------|-----------|----------|----------|------------|---------------|
| 1  | C1qa                 | Il1b                 | Rsad2                | Top2a                | Rgcc                 | Retnla               | Gzma      | Il2rb     | Ccl22     | Cd3g     | Klk1     | Mcpt4      | Cd79a         |
| 2  | C1qb                 | Thbs1                | Marcks               | Ube2c                | Hilpda               | Rnase2a              | Gzmb      | Gzmb      | Ramp3     | Trbc2    | Ccr9     | Cpa3       | Ebf1          |
| 3  | C1qc                 | Ly6c2                | Ctsb                 | Mki67                | Bnip3                | Cd163                | Nkg7      | Prf1      | Cbfa2t3   | Cd3d     | Siglech  | Cyp11a1    | Ms4a1         |
| 4  | Ms4a7                | Ptgs2                | Sdc3                 | Birc5                | Lgals3               | Igf1                 | Prf1      | Nkg7      | Sept3     | Cd3e     | Cox6a2   | Mcpt8      | Iglc2         |
| 5  | Ctsc                 | Cd14                 | Rgl1                 | Tubb5                | Egin3                | Ednrb                | Ctla2a    | Trbc1     | Cd209a    | Ctla4    | Cyb561a3 | Gata2      | Fcmr          |
| 6  | Ccnd1                | Clec4e               | Hmox1                | Stmn1                | Il7r                 | Ccl24                | Il2rb     | Gzma      | Il4i1     | Trac     | Bcl11a   | Fcer1a     | Ly6d          |
| 7  | Trem2                | Gpr141               | Pspap                | Pclaf                | Arg1                 | Mrc1                 | Ms4a4b    | Trbc2     | Tbc1d4    | Icos     | Iglc3    | Hs3st1     | Pax5          |
| 8  | Cd72                 | Plaur                | Ifit2                | Hmgb2                | Ero1l                | Cltc                 | Ncr1      | Thy1      | Timd4     | Tnfrsf4  | Atp1b1   | Cd200r3    | Pou2af1       |
| 9  | Cd81                 | F10                  | Il18bp               | Hist1h1b             | Ndrgr1               | Ap2a2                | Txk       | Ms4a4b    | Lsp1      | Cd2      | Klk1b27  | Ms4a2      | Tnfrsf13c     |
| 10 | Cd63                 | Ccr2                 | Irf7                 | Tuba1b               | Ctsl                 | Selenop              | Klr1d1    | Cd3g      | Syng2     | Cd8b1    | Fcrla    | Il13       | Mzb1          |
| 11 | Cadm1                | Cebpb                | Plin2                | Cdk1                 | Hmox1                | Maf                  | Serpinb6b | Satb1     | Ccr7      | Cxcr6    | Cd7a     | Mrgprb1    | Igkc          |
| 12 | Sash1                | S100a11              | Clec4a1              | Cdca8                | Ftl1                 | Dazap2               | Satb1     | Icos      | Cst3      | Cd28     | Pacsin1  | Tph1       | Iglc1         |
| 13 | Camk1                | Cdkn1a               | Oas3                 | Cenpf                | Plin2                | Ccl6                 | Ctsw      | Serpinb9  | Cacnb3    | Tnfrsf18 | Mctp2    | Il4        | Iglc3         |
| 14 | Hexa                 | Lst1                 | Sifn5                | Smc2                 | Nos2                 | Ccl9                 | Gimap4    | Klr1d1    | Cytip     | Pdcd1    | Spib     | Tpsb2      | Ighd          |
| 15 | Grn                  | Mcomp1               | Ifi44                | Cdca3                | Slc2a1               | Junb                 | Sept1     | Sh2d2a    | Mmp25     | Lat      | Mzb1     | Tpsab1     | Bank1         |
| 16 | Lyz2                 | Jarid2               | Cd274                | Tpx2                 | Clec4d               | Gm42418              | Trbc1     | Vps37b    | Gcnt2     | Bcl11b   | Snim5    | Ctsg       | Cd79b         |
| 17 | Pld4                 | Prdx5                | Grina                | Prc1                 | Inhba                | Lgmn                 | Car2      | Cd3d      | Pkib      | Cd8a     | Tmem108  | Serpinb1a  | Bcl11a        |
| 18 | Cd93                 | Socs3                | Ifi202b              | Cks1b                | F10                  | Fcgrt                | Sh2d2a    | Tnfrsf9   | H2-Aa     | Thy1     | Gm21762  | Cma1       | Siglecg       |
| 19 | Adgre1               | Malt1                | Oasl2                | Cenpe                | Basp1                | Clec10a              | Eomes     | Ets1      | H2-Eb1    | Cd6      | Rnase6   | Hdc        | Ralgs2        |
| 20 | Cxcl16               | Ms4a4c               | Ednrb                | Smc4                 | Fth1                 | Mafb                 | Klr1e     | Serpinb6b | Napsa     | Lck      | Sla2     | Il1r1      | Cd55          |
| 21 | Plau                 | Vcan                 | Ifi204               | Pttg1                | Cstb                 | Cbr2                 | Trdc      | Cd3e      | Atox1     | Itk      | Runx2    | Klf5       | Ighm          |
| 22 | Ch25h                | Tlr2                 | Gm15056              | Racgap1              | Card19               | Marcks               | Skap1     | Lck       | H2-DMb2   | Gimap3   | Ighm     | Syt13      | Ccr7          |
| 23 | Dab2                 | Plac8                | Lgmn                 | Ccna2                | P4hb                 | Gas6                 | Serpinb9  | Ikzf2     | Il1r2     | Cd27     | Sell     | Hgf        | Scd1          |
| 24 | Fcgr3                | Nfkbia               | Maf                  | Rrm2                 | Adam8                | F13a1                | Ptprcap   | Ablim1    | Cd74      | Ptprcap  | Tubgcp5  | Cish       | Gm8369        |
| 25 | Msr1                 | Csf2rb               | Cfb                  | Ccnb2                | Mmp12                | Dusp1                | Serpinb9b | Ctla2a    | Gnb4      | Skap1    | Rel1     | Socs2      | Mef2c         |
| 26 | C3ar1                | Ltb4r1               | Oas1l                | Tk1                  | Srgn                 | Jund                 | Gimap3    | Trac      | Cd24a     | Cd5      | Rabgap1l | Furin      | Rps27         |
| 27 | Timp2                | Cybb                 | Fgl2                 | Nusap1               | Prdx6                | Gda                  | Gem       | Gimap3    | H2-Ab1    | Ms4a4b   | Tcf4     | Cyp4f18    | BE692007      |
| 28 | Slamf9               | Samhd1               | Ifit1                | Ccnb1                | Mxi1                 | Timp2                | Bcl2      | Ptprcap   | Etv3      | Ets1     | Tex2     | Il6        | 4930523C07Rik |
| 29 | Clec12a              | Slc7a11              | Ctsd                 | Cdc20                | Grina                | Klf6                 | Vps37b    | Txk       | Fscn1     | Sept1    | Abhd17b  | Itk        | Cd37          |
| 30 | Hexb                 | Osm                  | Creg1                | Incenp               | Mmp8                 | Zfp361l              | Ablim1    | Cd28      | S100a11   | Sh2d2a   | St8sia4  | Ier3       | Serp1         |
| 31 | Gatm                 | Nlrp3                | Isg15                | Hist1h2ap            | Vegfa                | Egr1                 | Ets1      | Bcl2      | Myo1g     | Il2rb    | Blnk     | Slc7a5     | S1pr1         |
| 32 | Stab1                | Nrg1                 | Sifn4                | H2afx                | Pdpm                 | Klf4                 | Klra3     | Cd8a      | Tuba1a    | Gimap4   | Mef2c    | Ctse       | Jund          |
| 33 | Ctss                 | Ccrl2                | Ctsl                 | Tmpo                 | Cxcl3                | Mgl2                 | AW112010  | Ctla4     | Rel       | Ltb      | Tspan13  | Cd9        | Sell          |
| 34 | Igfbp4               | Hp                   | Gbp4                 | Ran                  | Slc7a2               | Glul                 | Irf8      | Nabp1     | Mgl2      | Ablim1   | Slpi     | Inpp4b     | Smc6          |
| 35 | Unc93b1              | Sod2                 | Ccl8                 | Anp32b               | Cxcl2                | Ap1b1                | Ptprc     | Gimap4    | St8sia4   | Il2ra    | Dnajc7   | Csf1       | Foxp1         |
| 36 | Apoe                 | Ifitm6               | Wfdc17               | H2afz                | Smox                 | Aplp2                | Ugcg      | Skap1     | Crip1     | Nkg7     | P2ry14   | Gcnt1      | Napsa         |
| 37 | Itm2b                | Cytip                | Dusp1                | Ube2s                | Mmp13                | Ccl8                 | Ptpn22    | Nrgn      | Traf1     | Tnfrsf9  | Nucb2    | Neat1      | Gimap6        |
| 38 | Snx2                 | Ly6i                 | Saa3                 | Nucks1               | Fabp5                | Trf                  | Klrk1     | Ptpn22    | Ncoa7     | Trbc1    | Gpr171   | Csf2rb     | H2-DMb2       |
| 39 | Cfp                  | Ier3                 | Cmpk2                | Cks2                 | Slpi                 | Stard8               | Ifngr1    | Klrc1     | H2afz     | Ptpn22   | Tcf12    | Tax1bp1    | Zbtb20        |
| 40 | Ccl12                | Cxcl2                | Tnfaip2              | Tubb4b               | Mt1                  | Zfp703               | Selplg    | Cd8b1     | Map4k4    | Vgll4    | Irf8     | Csf2rb2    | Blnk          |
| 41 | Pmp22                | Smox                 | Fabp5                | Slamf9               | Errfi1               | Klf2                 | Dennd4a   | Ctsw      | H2-DMb1   | Satb1    | Smc6     | Gm20186    | Stk17b        |
| 42 | Ccl7                 | Vegfa                | S100a9               | Ranbp1               | Thbs1                | Fosb                 | Thy1      | Tnfrsf18  | Ifitm1    | Vps37b   | Bst2     | Ifitm1     | Ets1          |
| 43 | Fcgr4                | Slpi                 | Prdx1                | C1qa                 | Phda1                | Idh1                 | Vgll4     | Ncr1      | Wdfy4     | Gzmb     | Selplg   | Fosb       | Satb1         |
| 44 | Fcgr2b               | Inhba                | G0s2                 | C1qb                 | Cxcl1                | Lbh                  | Tnfrsf9   | Cxcr6     | Serpinb6b | Ikzf2    | Cadm1    | Ctla2a     | Cd69          |
| 45 | Cxcl9                | Cd74                 | S100a8               | C1qc                 | Plk2                 | Rhob                 | Il18rap   | Itgal     | Tnip3     | Klr1d1   | Xbp1     | Egr3       | Dnajc7        |
| 46 | Mrc1                 | Id3                  | Chil3                | Cenpa                | Ptgs2                | Wwp1                 | Gzmc      | Ltb       | Tmem123   | Smad7    | Mpeg1    | Rgs1       | Slamf6        |
| 47 | Ccl2                 | H2-Aa                | Arg1                 | Gatm                 | Hbegf                | Fn1                  | Xcl1      | Gzmc      | Naaa      | Prf1     | Pld4     | Ccl3       | Rabgap1l      |
| 48 | Atp1b3               | Il1a                 | Cd36                 | Ch25h                | Il1a                 | Rnase4               | Cemip2    | Serpinb9  | Uhrf2     | Ptpt     | Ccl4     | Ccl4       | Pde7a         |
| 49 | Iigp1                | H2-Ab1               | Pf4                  | Pcna                 | Pf4                  | Wfdc17               | Ccl5      | Stat3     | Samsn1    | Rora     | Plac8    | Plk3       | Fchsd2        |
| 50 | Vcam1                | Cxcl10               | Ccl24                | Ccl12                | Hspa1a               | Hal                  | Gzmd      | Gzmf      | Ccl5      | Gzmf     | Ncf1     | Frm4b      | Tsc22d3       |

**Table S1:** Clusters identified by single cell RNAseq in the CT26 tumor infiltrate.

TABLE S2

| Macrophage Cluster 3 |         |          |           |       |       |           | Macrophage Cluster 5 |          |          |           |       |       |           |
|----------------------|---------|----------|-----------|-------|-------|-----------|----------------------|----------|----------|-----------|-------|-------|-----------|
|                      |         | p_val    | avg_logFC | pct.1 | pct.2 | p_val_adj |                      |          | p_val    | avg_logFC | pct.1 | pct.2 | p_val_adj |
| 1                    | Cxcl9   | 2.56E-28 | 1.387886  | 0.634 | 0.266 | 5.29E-24  | 1                    | Nos2     | 3.55E-23 | -1.0948   | 0.333 | 0.73  | 7.33E-19  |
| 2                    | Rps12   | 1.44E-23 | 0.407943  | 1     | 0.994 | 2.96E-19  | 2                    | Rps3a1   | 4.91E-23 | 0.391922  | 0.995 | 0.975 | 1.01E-18  |
| 3                    | Ftl1    | 6.64E-23 | -0.41809  | 1     | 1     | 1.37E-18  | 3                    | Rpl12    | 5.91E-22 | 0.552619  | 0.949 | 0.863 | 1.22E-17  |
| 4                    | Rpl23   | 3.87E-22 | 0.372373  | 0.993 | 0.977 | 8.00E-18  | 4                    | Gm15056  | 1.15E-20 | -1.75618  | 0.081 | 0.412 | 2.37E-16  |
| 5                    | Rps24   | 1.84E-20 | 0.373368  | 1     | 0.979 | 3.80E-16  | 5                    | Rpl32    | 1.64E-20 | 0.504434  | 0.98  | 0.967 | 3.39E-16  |
| 6                    | Cstb    | 6.49E-20 | -0.41189  | 0.959 | 0.988 | 1.34E-15  | 6                    | Rpl3     | 4.26E-20 | 0.451053  | 0.944 | 0.875 | 8.80E-16  |
| 7                    | Rpl18a  | 1.81E-19 | 0.396118  | 0.979 | 0.951 | 3.74E-15  | 7                    | Rpl13a   | 2.00E-19 | 0.480926  | 0.955 | 0.919 | 4.13E-15  |
| 8                    | Igfbp4  | 1.84E-19 | 0.503659  | 0.324 | 0.085 | 3.80E-15  | 8                    | Rps12    | 3.39E-19 | 0.462887  | 0.995 | 0.982 | 7.00E-15  |
| 9                    | Hmox1   | 5.57E-19 | -0.68678  | 0.766 | 0.952 | 1.15E-14  | 9                    | Eef1a1   | 2.99E-18 | 0.322594  | 1     | 0.99  | 6.18E-14  |
| 10                   | Rps4x   | 6.59E-19 | 0.435325  | 0.993 | 0.964 | 1.36E-14  | 10                   | Lyz2     | 4.09E-18 | 0.81      | 0.899 | 0.766 | 8.44E-14  |
| 11                   | Rpl13a  | 3.58E-18 | 0.442749  | 0.972 | 0.949 | 7.39E-14  | 11                   | Rps4x    | 4.42E-18 | 0.412588  | 0.97  | 0.964 | 9.14E-14  |
| 12                   | Fth1    | 4.16E-18 | -0.64596  | 1     | 1     | 8.59E-14  | 12                   | Rps20    | 5.11E-18 | 0.379528  | 0.995 | 0.975 | 1.05E-13  |
| 13                   | Rps20   | 6.04E-18 | 0.376904  | 0.993 | 0.987 | 1.25E-13  | 13                   | Rps8     | 5.87E-18 | 0.388401  | 0.995 | 0.969 | 1.21E-13  |
| 14                   | Apoe    | 6.99E-18 | 0.780726  | 0.952 | 0.781 | 1.44E-13  | 14                   | Rps19    | 1.52E-17 | 0.427067  | 0.98  | 0.947 | 3.14E-13  |
| 15                   | Rpl13   | 8.04E-18 | 0.38878   | 0.986 | 0.979 | 1.66E-13  | 15                   | Socs1    | 1.95E-17 | -0.8792   | 0.263 | 0.527 | 4.02E-13  |
| 16                   | Grina   | 1.75E-16 | -0.52504  | 0.766 | 0.925 | 3.61E-12  | 16                   | Rpl10a   | 2.54E-17 | 0.506779  | 0.949 | 0.845 | 5.24E-13  |
| 17                   | H2-Ab1  | 1.88E-16 | 0.821725  | 0.876 | 0.78  | 3.87E-12  | 17                   | Tapbp    | 5.17E-17 | -0.65621  | 0.596 | 0.789 | 1.07E-12  |
| 18                   | Rps19   | 1.96E-16 | 0.362926  | 0.979 | 0.966 | 4.05E-12  | 18                   | Rpl13    | 5.76E-17 | 0.419681  | 0.985 | 0.962 | 1.19E-12  |
| 19                   | Rpl27a  | 2.08E-16 | 0.323732  | 1     | 0.987 | 4.30E-12  | 19                   | Zbp1     | 5.92E-17 | -0.5998   | 0.283 | 0.646 | 1.22E-12  |
| 20                   | Atp1b3  | 3.93E-16 | 0.532755  | 0.89  | 0.892 | 8.11E-12  | 20                   | Grina    | 7.17E-17 | -0.59042  | 0.798 | 0.941 | 1.48E-12  |
| 21                   | Cd86    | 4.52E-16 | 0.429905  | 0.448 | 0.335 | 9.34E-12  | 21                   | Rps27a   | 7.29E-17 | 0.383932  | 0.995 | 0.964 | 1.50E-12  |
| 22                   | Rpl30   | 7.22E-16 | 0.347924  | 0.986 | 0.968 | 1.49E-11  | 22                   | Sod2     | 7.74E-17 | -0.70217  | 0.753 | 0.896 | 1.60E-12  |
| 23                   | Clec4d  | 1.07E-15 | -0.70028  | 0.531 | 0.787 | 2.20E-11  | 23                   | Trmsb10  | 1.02E-16 | -0.72184  | 0.909 | 0.969 | 2.11E-12  |
| 24                   | Rps11   | 1.32E-15 | 0.41841   | 0.993 | 0.975 | 2.72E-11  | 24                   | Rps5     | 1.45E-16 | 0.432161  | 0.96  | 0.952 | 3.00E-12  |
| 25                   | Eef1a1  | 1.59E-15 | 0.27884   | 1     | 0.997 | 3.29E-11  | 25                   | Ccl6     | 1.88E-16 | 0.641943  | 0.924 | 0.718 | 3.88E-12  |
| 26                   | Tpt1    | 1.85E-15 | 0.245561  | 1     | 1     | 3.81E-11  | 26                   | Mrc1     | 1.89E-16 | 0.891925  | 0.813 | 0.534 | 3.90E-12  |
| 27                   | Trf     | 2.01E-15 | 0.581443  | 0.531 | 0.339 | 4.15E-11  | 27                   | B2m      | 6.25E-16 | -0.38365  | 1     | 1     | 1.29E-11  |
| 28                   | Por     | 2.20E-15 | -0.4174   | 0.503 | 0.825 | 4.55E-11  | 28                   | Rpl5     | 7.23E-16 | 0.536326  | 0.909 | 0.753 | 1.49E-11  |
| 29                   | Ccnd1   | 2.31E-15 | 0.608515  | 0.462 | 0.303 | 4.78E-11  | 29                   | Rack1    | 7.79E-16 | 0.447237  | 0.97  | 0.898 | 1.61E-11  |
| 30                   | Rpl19   | 4.48E-15 | 0.299707  | 0.993 | 0.981 | 9.25E-11  | 30                   | Rpl14    | 1.09E-15 | 0.464316  | 0.929 | 0.83  | 2.24E-11  |
| 31                   | Rps16   | 4.94E-15 | 0.326395  | 1     | 0.988 | 1.02E-10  | 31                   | Ccl9     | 1.27E-15 | 0.540685  | 0.909 | 0.69  | 2.62E-11  |
| 32                   | Rps10   | 8.27E-15 | 0.356878  | 0.986 | 0.98  | 1.71E-10  | 32                   | AW112010 | 2.54E-15 | -1.08653  | 0.46  | 0.702 | 5.25E-11  |
| 33                   | Ell2    | 9.12E-15 | -0.55826  | 0.31  | 0.639 | 1.88E-10  | 33                   | Cstb     | 4.05E-15 | -0.3851   | 0.97  | 0.992 | 8.37E-11  |
| 34                   | Rps15   | 9.54E-15 | 0.409783  | 0.986 | 0.965 | 1.97E-10  | 34                   | Rps11    | 4.19E-15 | 0.397807  | 0.98  | 0.957 | 8.65E-11  |
| 35                   | Rpl28   | 9.88E-15 | 0.372546  | 0.993 | 0.96  | 2.04E-10  | 35                   | Rpl18a   | 4.70E-15 | 0.399111  | 0.985 | 0.934 | 9.71E-11  |
| 36                   | Rps9    | 1.43E-14 | 0.337039  | 0.986 | 0.996 | 2.96E-10  | 36                   | Pf4      | 4.71E-15 | 0.840589  | 0.818 | 0.537 | 9.72E-11  |
| 37                   | Rpl6    | 1.77E-14 | 0.326065  | 0.993 | 0.96  | 3.65E-10  | 37                   | Rpsa     | 5.26E-15 | 0.373682  | 0.955 | 0.934 | 1.09E-10  |
| 38                   | Rpl23a  | 3.35E-14 | 0.374767  | 0.966 | 0.933 | 6.92E-10  | 38                   | Rps7     | 6.14E-15 | 0.365886  | 0.98  | 0.939 | 1.27E-10  |
| 39                   | Rpl10a  | 7.38E-14 | 0.403634  | 0.966 | 0.922 | 1.52E-09  | 39                   | Glrx     | 7.38E-15 | -0.77414  | 0.677 | 0.832 | 1.52E-10  |
| 40                   | Lgals3  | 8.43E-14 | -0.58529  | 0.945 | 0.981 | 1.74E-09  | 40                   | Rps14    | 8.72E-15 | 0.327626  | 0.975 | 0.954 | 1.80E-10  |
| 41                   | Rps27a  | 9.95E-14 | 0.293781  | 1     | 0.981 | 2.05E-09  | 41                   | Rplp1    | 9.84E-15 | 0.393351  | 0.985 | 0.99  | 2.03E-10  |
| 42                   | Gm10076 | 1.18E-13 | 0.292342  | 0.545 | 0.505 | 2.44E-09  | 42                   | Cebpb    | 1.15E-14 | 0.383075  | 0.995 | 0.908 | 2.37E-10  |
| 43                   | Glrx    | 1.74E-13 | -0.56945  | 0.655 | 0.876 | 3.59E-09  | 43                   | Rps13    | 1.17E-14 | 0.324799  | 0.985 | 0.947 | 2.42E-10  |
| 44                   | Cd81    | 1.82E-13 | 0.410449  | 0.345 | 0.116 | 3.75E-09  | 44                   | Rps15    | 1.89E-14 | 0.415933  | 0.965 | 0.921 | 3.91E-10  |
| 45                   | Cd36    | 2.42E-13 | -0.94507  | 0.193 | 0.449 | 4.99E-09  | 45                   | Rps24    | 2.14E-14 | 0.343876  | 0.99  | 0.972 | 4.43E-10  |
| 46                   | Rps5    | 2.57E-13 | 0.360872  | 0.986 | 0.976 | 5.30E-09  | 46                   | Timp2    | 6.78E-14 | 0.741964  | 0.535 | 0.277 | 1.40E-09  |
| 47                   | Rps7    | 2.64E-13 | 0.356396  | 1     | 0.96  | 5.44E-09  | 47                   | Rps10    | 8.40E-14 | 0.347008  | 0.995 | 0.967 | 1.74E-09  |
| 48                   | Eef1b2  | 3.26E-13 | 0.370191  | 0.952 | 0.881 | 6.72E-09  | 48                   | Rpl17    | 1.74E-13 | 0.367938  | 0.975 | 0.944 | 3.59E-09  |
| 49                   | Lilr4b  | 7.02E-13 | -0.42412  | 0.793 | 0.927 | 1.45E-08  | 49                   | Prdx6    | 2.09E-13 | -0.64006  | 0.747 | 0.911 | 4.32E-09  |
| 50                   | Rpl32   | 1.34E-12 | 0.37917   | 0.986 | 0.967 | 2.77E-08  | 50                   | Il1rn    | 3.22E-13 | -0.6375   | 0.783 | 0.931 | 6.65E-09  |

TABLE S2 (CONT.)

| Macrophage Cluster 3 |          |          |           |       |       |           | Macrophage Cluster 5 |          |          |           |       |       |           |
|----------------------|----------|----------|-----------|-------|-------|-----------|----------------------|----------|----------|-----------|-------|-------|-----------|
|                      |          | p_val    | avg_logFC | pct.1 | pct.2 | p_val_adj |                      |          | p_val    | avg_logFC | pct.1 | pct.2 | p_val_adj |
| 51                   | Rplp2    | 1.46E-12 | 0.320473  | 1     | 0.976 | 3.01E-08  | 51                   | Irf7     | 5.17E-13 | -0.54559  | 0.495 | 0.781 | 1.07E-08  |
| 52                   | Cox7a2l  | 1.60E-12 | 0.360855  | 0.752 | 0.716 | 3.30E-08  | 52                   | S100a4   | 6.35E-13 | 0.575561  | 0.884 | 0.735 | 1.31E-08  |
| 53                   | Gas5     | 1.85E-12 | 0.321564  | 0.503 | 0.477 | 3.83E-08  | 53                   | Rpl27a   | 6.92E-13 | 0.305083  | 0.98  | 0.98  | 1.43E-08  |
| 54                   | Rplp1    | 2.59E-12 | 0.245388  | 0.993 | 0.997 | 5.35E-08  | 54                   | Rps15a   | 1.14E-12 | 0.318098  | 0.975 | 0.977 | 2.35E-08  |
| 55                   | Rpl17    | 6.35E-12 | 0.350173  | 0.993 | 0.971 | 1.31E-07  | 55                   | Rps3     | 1.47E-12 | 0.298836  | 0.98  | 0.941 | 3.04E-08  |
| 56                   | Cd83     | 7.20E-12 | 0.572638  | 0.669 | 0.548 | 1.49E-07  | 56                   | Rpl23    | 1.75E-12 | 0.323427  | 0.995 | 0.982 | 3.61E-08  |
| 57                   | Atp5g2   | 8.16E-12 | 0.334846  | 0.91  | 0.893 | 1.68E-07  | 57                   | Eef1b2   | 2.51E-12 | 0.468619  | 0.869 | 0.743 | 5.19E-08  |
| 58                   | Ctsl     | 8.24E-12 | -0.64894  | 0.966 | 0.992 | 1.70E-07  | 58                   | AA467197 | 3.05E-12 | -1.02935  | 0.182 | 0.438 | 6.30E-08  |
| 59                   | Rps3     | 8.41E-12 | 0.321921  | 0.979 | 0.944 | 1.74E-07  | 59                   | Npc2     | 3.49E-12 | -0.37602  | 0.98  | 0.997 | 7.20E-08  |
| 60                   | Blvrb    | 1.02E-11 | -0.49678  | 0.745 | 0.882 | 2.11E-07  | 60                   | Selenop  | 4.36E-12 | 0.636955  | 0.475 | 0.214 | 9.01E-08  |
| 61                   | Eif3f    | 1.40E-11 | 0.357628  | 0.91  | 0.86  | 2.89E-07  | 61                   | Slamf7   | 6.97E-12 | -0.61454  | 0.157 | 0.417 | 1.44E-07  |
| 62                   | Fau      | 1.60E-11 | 0.264386  | 1     | 0.99  | 3.30E-07  | 62                   | Prdx5    | 8.66E-12 | -0.50848  | 0.909 | 0.975 | 1.79E-07  |
| 63                   | Heatr5a  | 1.82E-11 | 0.192735  | 0.269 | 0.17  | 3.76E-07  | 63                   | Fth1     | 9.28E-12 | -0.44774  | 1     | 1     | 1.92E-07  |
| 64                   | Rpl37a   | 2.66E-11 | 0.329926  | 1     | 0.988 | 5.50E-07  | 64                   | H2-T23   | 9.91E-12 | -0.50225  | 0.444 | 0.669 | 2.05E-07  |
| 65                   | Rpl5     | 2.89E-11 | 0.380935  | 0.945 | 0.874 | 5.96E-07  | 65                   | mt-Nd1   | 1.06E-11 | 0.539582  | 0.899 | 0.85  | 2.19E-07  |
| 66                   | Ii10ra   | 3.32E-11 | 0.365333  | 0.634 | 0.546 | 6.86E-07  | 66                   | Slc31a1  | 1.26E-11 | -0.53055  | 0.399 | 0.656 | 2.60E-07  |
| 67                   | Twf2     | 3.47E-11 | 0.263309  | 0.579 | 0.565 | 7.16E-07  | 67                   | Rsad2    | 1.33E-11 | -0.89516  | 0.318 | 0.623 | 2.74E-07  |
| 68                   | Rps3a1   | 3.94E-11 | 0.273536  | 1     | 0.987 | 8.14E-07  | 68                   | Slc31a2  | 1.36E-11 | -0.40679  | 0.333 | 0.618 | 2.82E-07  |
| 69                   | Rpl36a   | 4.69E-11 | 0.335942  | 0.897 | 0.849 | 9.68E-07  | 69                   | Upp1     | 1.38E-11 | -0.4806   | 0.399 | 0.705 | 2.86E-07  |
| 70                   | H2-Eb1   | 5.17E-11 | 0.728322  | 0.821 | 0.687 | 1.07E-06  | 70                   | Gbp2b    | 1.59E-11 | -0.55761  | 0.333 | 0.618 | 3.28E-07  |
| 71                   | Slc48a1  | 5.59E-11 | -0.47072  | 0.49  | 0.75  | 1.15E-06  | 71                   | Gbp2     | 1.67E-11 | -0.60797  | 0.343 | 0.641 | 3.44E-07  |
| 72                   | Cd274    | 6.77E-11 | -0.48477  | 0.717 | 0.893 | 1.40E-06  | 72                   | Rpl7     | 1.84E-11 | 0.337044  | 0.99  | 0.962 | 3.81E-07  |
| 73                   | Dnase1l3 | 6.84E-11 | 0.361288  | 0.228 | 0.083 | 1.41E-06  | 73                   | Rpl8     | 2.27E-11 | 0.253696  | 0.949 | 0.962 | 4.70E-07  |
| 74                   | Palld    | 6.95E-11 | 0.296046  | 0.366 | 0.22  | 1.44E-06  | 74                   | Cd274    | 2.56E-11 | -0.56469  | 0.677 | 0.835 | 5.28E-07  |
| 75                   | C1qb     | 7.15E-11 | 0.654351  | 0.662 | 0.594 | 1.48E-06  | 75                   | Fcgrt    | 5.45E-11 | 0.551011  | 0.323 | 0.145 | 1.12E-06  |
| 76                   | Prdx6    | 7.40E-11 | -0.52589  | 0.476 | 0.697 | 1.53E-06  | 76                   | Rpl9     | 5.79E-11 | 0.298479  | 0.985 | 0.969 | 1.20E-06  |
| 77                   | Ctsd     | 8.17E-11 | -0.43154  | 0.952 | 0.992 | 1.69E-06  | 77                   | Rpl22    | 6.47E-11 | 0.322706  | 0.919 | 0.901 | 1.34E-06  |
| 78                   | Rack1    | 8.66E-11 | 0.28781   | 0.972 | 0.97  | 1.79E-06  | 78                   | Caln3    | 6.69E-11 | -0.4285   | 0.677 | 0.758 | 1.38E-06  |
| 79                   | Rpl3     | 1.01E-10 | 0.331619  | 0.993 | 0.952 | 2.08E-06  | 79                   | Rplp0    | 7.43E-11 | 0.339448  | 0.975 | 0.936 | 1.53E-06  |
| 80                   | Sod2     | 1.11E-10 | -0.50337  | 0.786 | 0.909 | 2.29E-06  | 80                   | Cd300lf  | 9.30E-11 | -0.60384  | 0.586 | 0.763 | 1.92E-06  |
| 81                   | Rpl12    | 1.56E-10 | 0.324756  | 0.972 | 0.948 | 3.21E-06  | 81                   | Rpl27    | 1.03E-10 | 0.310947  | 0.975 | 0.952 | 2.12E-06  |
| 82                   | Rps25    | 2.16E-10 | 0.284324  | 0.931 | 0.937 | 4.45E-06  | 82                   | Rpl28    | 1.04E-10 | 0.357823  | 0.97  | 0.962 | 2.15E-06  |
| 83                   | Smpd13a  | 2.28E-10 | -0.47752  | 0.476 | 0.716 | 4.71E-06  | 83                   | Cd200    | 1.06E-10 | -0.62371  | 0.086 | 0.333 | 2.19E-06  |
| 84                   | H2-Aa    | 2.74E-10 | 0.742458  | 0.89  | 0.771 | 5.65E-06  | 84                   | Rpl7a    | 1.29E-10 | 0.301745  | 0.944 | 0.898 | 2.67E-06  |
| 85                   | Lyz2     | 2.83E-10 | 0.492306  | 0.972 | 0.915 | 5.85E-06  | 85                   | Rps25    | 1.42E-10 | 0.277815  | 0.939 | 0.919 | 2.93E-06  |
| 86                   | R3hcc1l  | 3.51E-10 | 0.103478  | 0.117 | 0.117 | 7.24E-06  | 86                   | Hk3      | 1.59E-10 | -0.47896  | 0.384 | 0.628 | 3.29E-06  |
| 87                   | Eif4e    | 3.56E-10 | -0.37911  | 0.538 | 0.777 | 7.34E-06  | 87                   | Ly6c2    | 1.73E-10 | -0.69741  | 0.187 | 0.466 | 3.57E-06  |
| 88                   | Rpl7     | 3.92E-10 | 0.296474  | 1     | 0.972 | 8.10E-06  | 88                   | Rnf149   | 2.04E-10 | -0.42902  | 0.389 | 0.611 | 4.20E-06  |
| 89                   | Commd4   | 4.58E-10 | 0.116971  | 0.379 | 0.419 | 9.47E-06  | 89                   | Sifn5    | 2.68E-10 | -0.62098  | 0.359 | 0.595 | 5.53E-06  |
| 90                   | Gm14636  | 4.73E-10 | -0.66941  | 0.228 | 0.486 | 9.77E-06  | 90                   | Rps26    | 3.20E-10 | 0.302229  | 0.97  | 0.947 | 6.62E-06  |
| 91                   | Ly86     | 4.77E-10 | 0.397399  | 0.731 | 0.625 | 9.86E-06  | 91                   | Mdm2     | 3.88E-10 | -0.53187  | 0.672 | 0.809 | 8.01E-06  |
| 92                   | Cndp2    | 5.79E-10 | -0.3295   | 0.91  | 0.963 | 1.20E-05  | 92                   | Rpl11    | 4.25E-10 | 0.295459  | 0.965 | 0.944 | 8.77E-06  |
| 93                   | AA467197 | 6.27E-10 | -0.64409  | 0.166 | 0.363 | 1.30E-05  | 93                   | Rps16    | 6.55E-10 | 0.276385  | 0.99  | 0.985 | 1.35E-05  |
| 94                   | Rps29    | 6.75E-10 | 0.184879  | 1     | 0.992 | 1.39E-05  | 94                   | Cfb      | 7.49E-10 | -0.59157  | 0.278 | 0.499 | 1.55E-05  |
| 95                   | Cd74     | 6.99E-10 | 0.65164   | 0.966 | 0.884 | 1.44E-05  | 95                   | Inhba    | 1.04E-09 | -0.71707  | 0.53  | 0.758 | 2.15E-05  |
| 96                   | Prdx1    | 7.07E-10 | -0.58071  | 0.979 | 0.992 | 1.46E-05  | 96                   | Dtx2     | 1.14E-09 | -0.36577  | 0.111 | 0.321 | 2.36E-05  |
| 97                   | Rpl18    | 7.13E-10 | 0.306328  | 0.966 | 0.963 | 1.47E-05  | 97                   | Ifi44    | 1.15E-09 | -0.67336  | 0.293 | 0.534 | 2.38E-05  |
| 98                   | Ly6c2    | 7.19E-10 | -0.64411  | 0.407 | 0.68  | 1.48E-05  | 98                   | Plac8    | 1.35E-09 | -0.74649  | 0.505 | 0.738 | 2.79E-05  |
| 99                   | Serinc3  | 7.30E-10 | 0.343362  | 0.883 | 0.859 | 1.51E-05  | 99                   | Gas6     | 1.35E-09 | 0.435777  | 0.167 | 0.038 | 2.79E-05  |
| 100                  | Csf1r    | 7.40E-10 | 0.34238   | 0.848 | 0.806 | 1.53E-05  | 100                  | Psme2    | 1.46E-09 | -0.47641  | 0.571 | 0.72  | 3.01E-05  |

TABLE S2 (CONT.)

| Macrophage Cluster 3 |          |          |           |       |       |           | Macrophage Cluster 5 |           |          |           |       |       |           |
|----------------------|----------|----------|-----------|-------|-------|-----------|----------------------|-----------|----------|-----------|-------|-------|-----------|
|                      |          | p_val    | avg_logFC | pct.1 | pct.2 | p_val_adj |                      |           | p_val    | avg_logFC | pct.1 | pct.2 | p_val_adj |
| 101                  | H2-DMb1  | 8.31E-10 | 0.520577  | 0.683 | 0.473 | 1.72E-05  | 101                  | Fcgr1     | 1.89E-09 | -0.54998  | 0.601 | 0.789 | 3.91E-05  |
| 102                  | Oip5os1  | 8.51E-10 | 0.186252  | 0.434 | 0.444 | 1.76E-05  | 102                  | Ppia      | 2.06E-09 | 0.284314  | 0.955 | 0.962 | 4.25E-05  |
| 103                  | Pdlim5   | 1.16E-09 | 0.149774  | 0.372 | 0.415 | 2.39E-05  | 103                  | Ifi204    | 2.19E-09 | -0.45734  | 0.54  | 0.766 | 4.52E-05  |
| 104                  | Tecr     | 1.18E-09 | 0.231068  | 0.469 | 0.353 | 2.44E-05  | 104                  | F10       | 2.34E-09 | -0.49392  | 0.571 | 0.799 | 4.83E-05  |
| 105                  | Rpl27    | 1.23E-09 | 0.301668  | 0.986 | 0.966 | 2.54E-05  | 105                  | H2-K1     | 2.57E-09 | -0.33027  | 0.985 | 1     | 5.30E-05  |
| 106                  | Rgl1     | 1.49E-09 | -0.40273  | 0.724 | 0.881 | 3.07E-05  | 106                  | Sifn4     | 2.58E-09 | -0.57845  | 0.172 | 0.433 | 5.33E-05  |
| 107                  | mt-Nd4   | 1.80E-09 | 0.28365   | 0.966 | 0.974 | 3.71E-05  | 107                  | Ifi47     | 2.97E-09 | -0.49892  | 0.222 | 0.483 | 6.13E-05  |
| 108                  | mt-Cytb  | 2.01E-09 | 0.356525  | 0.979 | 0.987 | 4.16E-05  | 108                  | Cd83      | 3.11E-09 | 0.550536  | 0.581 | 0.374 | 6.43E-05  |
| 109                  | Rab4b    | 2.51E-09 | 0.212385  | 0.517 | 0.472 | 5.19E-05  | 109                  | Cd24a     | 3.74E-09 | -0.45491  | 0.141 | 0.389 | 7.72E-05  |
| 110                  | Rpl34    | 2.62E-09 | 0.249859  | 0.986 | 0.964 | 5.41E-05  | 110                  | Igfbp4    | 4.26E-09 | 0.306683  | 0.182 | 0.046 | 8.80E-05  |
| 111                  | Oat      | 2.62E-09 | 0.104066  | 0.4   | 0.473 | 5.42E-05  | 111                  | Dab2      | 5.92E-09 | 0.465928  | 0.889 | 0.794 | 0.000122  |
| 112                  | Vcam1    | 2.96E-09 | 0.630449  | 0.352 | 0.138 | 6.12E-05  | 112                  | Slc9a9    | 7.25E-09 | 0.243812  | 0.136 | 0.013 | 0.00015   |
| 113                  | Isoc1    | 2.97E-09 | 0.219888  | 0.4   | 0.407 | 6.13E-05  | 113                  | Rpl36a    | 7.75E-09 | 0.343753  | 0.859 | 0.789 | 0.00016   |
| 114                  | mt-Nd1   | 2.99E-09 | 0.278939  | 0.966 | 0.976 | 6.16E-05  | 114                  | Snx2      | 7.77E-09 | 0.388496  | 0.657 | 0.565 | 0.00016   |
| 115                  | Jaml     | 3.32E-09 | 0.394598  | 0.648 | 0.521 | 6.85E-05  | 115                  | Gda       | 7.80E-09 | 0.435237  | 0.672 | 0.461 | 0.000161  |
| 116                  | Dock11   | 3.80E-09 | 0.206049  | 0.324 | 0.256 | 7.84E-05  | 116                  | Isg15     | 8.37E-09 | -0.65661  | 0.379 | 0.621 | 0.000173  |
| 117                  | Sdf4     | 3.85E-09 | 0.174238  | 0.593 | 0.632 | 7.95E-05  | 117                  | Eef2      | 8.61E-09 | 0.314368  | 0.894 | 0.827 | 0.000178  |
| 118                  | Ptma     | 4.31E-09 | 0.227132  | 1     | 0.986 | 8.90E-05  | 118                  | Rtp4      | 9.35E-09 | -0.44881  | 0.227 | 0.476 | 0.000193  |
| 119                  | Upp1     | 4.36E-09 | -0.57258  | 0.324 | 0.555 | 9.00E-05  | 119                  | Rpl23a    | 9.58E-09 | 0.357193  | 0.939 | 0.86  | 0.000198  |
| 120                  | Saa3     | 4.68E-09 | -0.89862  | 0.083 | 0.313 | 9.67E-05  | 120                  | Ptges     | 1.14E-08 | -0.73361  | 0.091 | 0.267 | 0.000235  |
| 121                  | Sh3bp5   | 4.98E-09 | -0.39675  | 0.331 | 0.573 | 0.000103  | 121                  | Oas3      | 1.18E-08 | -0.36197  | 0.116 | 0.3   | 0.000243  |
| 122                  | Wfdc17   | 5.13E-09 | -0.56827  | 0.869 | 0.94  | 0.000106  | 122                  | C3        | 1.19E-08 | -0.29617  | 0.298 | 0.565 | 0.000246  |
| 123                  | Fcgr2b   | 5.39E-09 | 0.278309  | 0.931 | 0.906 | 0.000111  | 123                  | Rgl1      | 1.28E-08 | -0.47245  | 0.672 | 0.819 | 0.000264  |
| 124                  | mt-Atp6  | 5.72E-09 | 0.281694  | 0.979 | 0.993 | 0.000118  | 124                  | Folr2     | 1.30E-08 | 0.439604  | 0.379 | 0.17  | 0.000268  |
| 125                  | Txn1     | 5.80E-09 | -0.35411  | 0.903 | 0.962 | 0.00012   | 125                  | Rnase4    | 1.46E-08 | 0.369706  | 0.343 | 0.191 | 0.000302  |
| 126                  | Rpl39    | 5.83E-09 | 0.234376  | 1     | 0.965 | 0.00012   | 126                  | Car13     | 1.64E-08 | -0.31685  | 0.227 | 0.42  | 0.000339  |
| 127                  | H2-DMA   | 6.25E-09 | 0.363502  | 0.862 | 0.769 | 0.000129  | 127                  | H3f3a     | 1.65E-08 | -0.34294  | 0.955 | 0.977 | 0.000342  |
| 128                  | Sulf2    | 6.78E-09 | 0.184732  | 0.152 | 0.054 | 0.00014   | 128                  | Psmb9     | 1.69E-08 | -0.37042  | 0.545 | 0.756 | 0.00035   |
| 129                  | Nop53    | 7.76E-09 | 0.187211  | 0.538 | 0.553 | 0.00016   | 129                  | Gbp4      | 1.76E-08 | -0.58034  | 0.263 | 0.509 | 0.000364  |
| 130                  | Ednrb    | 7.99E-09 | -0.66374  | 0.145 | 0.384 | 0.000165  | 130                  | Rplp2     | 1.84E-08 | 0.293448  | 0.98  | 0.954 | 0.00038   |
| 131                  | Plpp3    | 8.19E-09 | -0.2474   | 0     | 0.138 | 0.000169  | 131                  | Aff1      | 2.04E-08 | -0.36493  | 0.298 | 0.455 | 0.000422  |
| 132                  | Adam8    | 8.47E-09 | -0.46694  | 0.579 | 0.801 | 0.000175  | 132                  | Gm4951    | 2.33E-08 | -0.3524   | 0.071 | 0.229 | 0.000482  |
| 133                  | Tspo     | 8.53E-09 | -0.28265  | 0.979 | 0.987 | 0.000176  | 133                  | Ctss      | 2.45E-08 | -0.36062  | 0.949 | 0.997 | 0.000506  |
| 134                  | Tbc1d22a | 8.59E-09 | 0.186284  | 0.262 | 0.198 | 0.000177  | 134                  | Slpi      | 2.47E-08 | -0.99025  | 0.328 | 0.573 | 0.00051   |
| 135                  | Slc16a3  | 8.68E-09 | -0.44971  | 0.531 | 0.739 | 0.000179  | 135                  | Rps6      | 2.47E-08 | 0.317194  | 0.889 | 0.855 | 0.000511  |
| 136                  | Uri1     | 8.89E-09 | 0.137253  | 0.179 | 0.156 | 0.000183  | 136                  | Zdhhc14   | 2.50E-08 | 0.164524  | 0.157 | 0.046 | 0.000516  |
| 137                  | Ubb      | 9.56E-09 | -0.36582  | 0.938 | 0.961 | 0.000197  | 137                  | Serpinb6a | 2.72E-08 | 0.480587  | 0.364 | 0.216 | 0.000562  |
| 138                  | Rnf128   | 1.03E-08 | -0.36361  | 0.09  | 0.302 | 0.000213  | 138                  | Trf       | 3.02E-08 | 0.620052  | 0.399 | 0.224 | 0.000624  |
| 139                  | Eif3e    | 1.31E-08 | 0.230467  | 0.662 | 0.649 | 0.00027   | 139                  | Laptm5    | 3.28E-08 | 0.321098  | 0.904 | 0.903 | 0.000677  |
| 140                  | Coro2a   | 1.36E-08 | -0.25649  | 0.152 | 0.398 | 0.00028   | 140                  | Ly6c1     | 3.38E-08 | -0.39324  | 0.066 | 0.244 | 0.000698  |
| 141                  | Pdia4    | 1.56E-08 | -0.3206   | 0.51  | 0.588 | 0.000322  | 141                  | Epb4111   | 3.92E-08 | 0.215337  | 0.197 | 0.071 | 0.000809  |
| 142                  | Ctsc     | 1.60E-08 | 0.281436  | 0.972 | 0.953 | 0.000331  | 142                  | Ifi2712a  | 4.12E-08 | -0.47059  | 0.813 | 0.896 | 0.000851  |
| 143                  | Arl4a    | 1.64E-08 | 0.127691  | 0.248 | 0.253 | 0.000339  | 143                  | Ccdc115   | 4.43E-08 | 0.233905  | 0.293 | 0.232 | 0.000914  |
| 144                  | F10      | 1.67E-08 | -0.49429  | 0.241 | 0.503 | 0.000345  | 144                  | Tnfrsf1b  | 5.11E-08 | -0.43039  | 0.631 | 0.753 | 0.001056  |
| 145                  | Rps28    | 1.70E-08 | 0.246963  | 1     | 0.984 | 0.000352  | 145                  | Rps23     | 5.31E-08 | 0.27708   | 0.949 | 0.941 | 0.001097  |
| 146                  | Cd68     | 1.81E-08 | -0.3849   | 0.862 | 0.933 | 0.000374  | 146                  | Met       | 5.41E-08 | -0.28756  | 0.172 | 0.389 | 0.001116  |
| 147                  | B2m      | 1.89E-08 | -0.21964  | 1     | 1     | 0.000391  | 147                  | Cd38      | 5.42E-08 | -0.42139  | 0.162 | 0.361 | 0.001119  |
| 148                  | Esd      | 2.01E-08 | -0.39661  | 0.669 | 0.85  | 0.000416  | 148                  | mt-Cytb   | 5.53E-08 | 0.417152  | 0.97  | 0.934 | 0.001141  |
| 149                  | C1qa     | 2.09E-08 | 0.592959  | 0.745 | 0.621 | 0.000433  | 149                  | Fn1       | 6.01E-08 | 0.762499  | 0.657 | 0.514 | 0.001241  |
| 150                  | Cadm1    | 2.14E-08 | 0.36125   | 0.324 | 0.118 | 0.000442  | 150                  | Apoe      | 6.09E-08 | 0.43547   | 0.803 | 0.677 | 0.001258  |

TABLE S2 (CONT.)

| Macrophage Cluster 3 |           |          |           |       |       |           | Macrophage Cluster 5 |          |          |           |       |       |           |
|----------------------|-----------|----------|-----------|-------|-------|-----------|----------------------|----------|----------|-----------|-------|-------|-----------|
|                      |           | p_val    | avg_logFC | pct.1 | pct.2 | p_val_adj |                      |          | p_val    | avg_logFC | pct.1 | pct.2 | p_val_adj |
| 151                  | Sp110     | 2.50E-08 | 0.21259   | 0.579 | 0.632 | 0.000516  | 151                  | Plpp3    | 6.41E-08 | -0.49026  | 0.187 | 0.407 | 0.001325  |
| 152                  | Pfdn5     | 2.58E-08 | 0.257302  | 0.91  | 0.897 | 0.000532  | 152                  | Rpl18    | 6.43E-08 | 0.296077  | 0.97  | 0.954 | 0.001328  |
| 153                  | Pnn       | 2.61E-08 | 0.125198  | 0.262 | 0.281 | 0.00054   | 153                  | Rps9     | 8.47E-08 | 0.245806  | 1     | 0.99  | 0.001749  |
| 154                  | Tppp3     | 2.75E-08 | -0.41012  | 0.2   | 0.446 | 0.000567  | 154                  | Comt     | 9.80E-08 | 0.205825  | 0.217 | 0.127 | 0.002023  |
| 155                  | Samm50    | 2.81E-08 | 0.219159  | 0.455 | 0.35  | 0.00058   | 155                  | Pde3b    | 1.04E-07 | 0.293506  | 0.258 | 0.115 | 0.002154  |
| 156                  | Usp48     | 2.85E-08 | 0.171512  | 0.276 | 0.232 | 0.000588  | 156                  | Tpt1     | 1.35E-07 | 0.144965  | 1     | 0.995 | 0.002779  |
| 157                  | Mdm2      | 3.02E-08 | -0.43529  | 0.552 | 0.747 | 0.000624  | 157                  | Plau     | 1.38E-07 | 0.601371  | 0.586 | 0.425 | 0.002855  |
| 158                  | Ccl2      | 3.19E-08 | -0.62072  | 0.834 | 0.929 | 0.000658  | 158                  | Rps21    | 1.42E-07 | 0.207241  | 0.99  | 0.962 | 0.002925  |
| 159                  | Ppp1r21   | 3.59E-08 | 0.206143  | 0.359 | 0.289 | 0.000741  | 159                  | mt-Nd4   | 1.55E-07 | 0.365023  | 0.914 | 0.919 | 0.003209  |
| 160                  | Rpl8      | 3.64E-08 | 0.197088  | 0.993 | 0.98  | 0.000752  | 160                  | Ilgp1    | 1.80E-07 | -0.71447  | 0.152 | 0.361 | 0.003717  |
| 161                  | Cd300f    | 3.71E-08 | -0.43749  | 0.49  | 0.688 | 0.000766  | 161                  | S100a8   | 2.03E-07 | -0.76386  | 0.273 | 0.483 | 0.004193  |
| 162                  | Ubc       | 4.04E-08 | -0.37066  | 0.876 | 0.951 | 0.000833  | 162                  | Rps18    | 2.04E-07 | 0.342766  | 0.823 | 0.735 | 0.004203  |
| 163                  | Cpsf4     | 4.08E-08 | 0.109321  | 0.234 | 0.255 | 0.000842  | 163                  | Ms4a4c   | 2.09E-07 | -0.38299  | 0.263 | 0.504 | 0.004309  |
| 164                  | Anxa4     | 4.24E-08 | -0.31439  | 0.759 | 0.889 | 0.000875  | 164                  | Ybx1     | 2.21E-07 | 0.24816   | 0.929 | 0.898 | 0.00457   |
| 165                  | Tgfbr2    | 4.54E-08 | 0.225531  | 0.469 | 0.433 | 0.000937  | 165                  | Tap1     | 2.35E-07 | -0.3726   | 0.515 | 0.682 | 0.004852  |
| 166                  | Slc40a1   | 4.55E-08 | 0.183359  | 0.069 | 0.119 | 0.000939  | 166                  | Rpl6     | 2.61E-07 | 0.266011  | 0.949 | 0.949 | 0.005395  |
| 167                  | Anapc1    | 4.59E-08 | 0.160148  | 0.324 | 0.284 | 0.000947  | 167                  | Atp5g2   | 2.70E-07 | 0.29313   | 0.843 | 0.786 | 0.005577  |
| 168                  | Slpi      | 4.95E-08 | -0.90625  | 0.2   | 0.398 | 0.001021  | 168                  | Kmt5a    | 2.87E-07 | -0.35284  | 0.328 | 0.55  | 0.005926  |
| 169                  | Ankrd11   | 4.97E-08 | 0.306525  | 0.662 | 0.539 | 0.001026  | 169                  | Rgs10    | 3.15E-07 | 0.30282   | 0.495 | 0.354 | 0.006495  |
| 170                  | Gpr132    | 5.35E-08 | 0.317914  | 0.448 | 0.387 | 0.001104  | 170                  | Npm1     | 3.24E-07 | 0.287231  | 0.874 | 0.832 | 0.006692  |
| 171                  | Tnf       | 5.65E-08 | -0.49004  | 0.469 | 0.701 | 0.001166  | 171                  | Ptma     | 3.30E-07 | 0.296421  | 0.975 | 0.947 | 0.006806  |
| 172                  | C6        | 5.99E-08 | 0.21951   | 0.103 | 0.009 | 0.001237  | 172                  | Plin2    | 3.84E-07 | -0.3708   | 0.914 | 0.977 | 0.007932  |
| 173                  | Arfgap3   | 6.29E-08 | 0.109269  | 0.207 | 0.217 | 0.001299  | 173                  | 1110038F | 4.11E-07 | -0.18827  | 0.167 | 0.254 | 0.008494  |
| 174                  | Tmem59    | 6.47E-08 | 0.182429  | 0.628 | 0.667 | 0.001336  | 174                  | H2-T22   | 4.70E-07 | -0.3651   | 0.495 | 0.616 | 0.009698  |
| 175                  | Hs6st1    | 6.51E-08 | 0.170633  | 0.145 | 0.106 | 0.001345  | 175                  | Ell2     | 4.72E-07 | -0.36987  | 0.369 | 0.608 | 0.009752  |
| 176                  | Ccar1     | 6.87E-08 | 0.163016  | 0.359 | 0.346 | 0.001419  | 176                  | Cfp      | 4.92E-07 | 0.381575  | 0.727 | 0.55  | 0.010162  |
| 177                  | Tuba1c    | 7.11E-08 | -0.27446  | 0.621 | 0.836 | 0.001468  | 177                  | Rpl39    | 5.00E-07 | 0.234487  | 0.965 | 0.949 | 0.010333  |
| 178                  | Inhba     | 7.30E-08 | -0.77315  | 0.11  | 0.323 | 0.001508  | 178                  | Rpl35    | 5.31E-07 | 0.2344    | 0.864 | 0.733 | 0.010964  |
| 179                  | Glipr2    | 7.39E-08 | -0.333    | 0.324 | 0.58  | 0.001526  | 179                  | Rps17    | 5.70E-07 | 0.269756  | 0.869 | 0.819 | 0.011776  |
| 180                  | Synrg     | 7.50E-08 | 0.156323  | 0.241 | 0.185 | 0.001548  | 180                  | Il7r     | 5.94E-07 | -0.40664  | 0.717 | 0.865 | 0.012269  |
| 181                  | Rhob      | 7.83E-08 | -0.24056  | 0.517 | 0.762 | 0.001616  | 181                  | Rapgef2  | 6.24E-07 | -0.47042  | 0.439 | 0.593 | 0.012882  |
| 182                  | Utp11     | 9.69E-08 | 0.126404  | 0.324 | 0.347 | 0.002002  | 182                  | Irf1     | 6.49E-07 | -0.49164  | 0.581 | 0.723 | 0.01341   |
| 183                  | Sowahc    | 9.82E-08 | 0.301563  | 0.428 | 0.448 | 0.002027  | 183                  | Saa3     | 6.68E-07 | -1.62843  | 0.056 | 0.209 | 0.013792  |
| 184                  | A93000711 | 1.08E-07 | -0.25333  | 0.145 | 0.366 | 0.002238  | 184                  | Fam168a  | 6.80E-07 | 0.137339  | 0.258 | 0.267 | 0.014049  |
| 185                  | Irf7      | 1.21E-07 | -0.20512  | 0.793 | 0.929 | 0.002506  | 185                  | Daglb    | 6.87E-07 | 0.18372   | 0.222 | 0.135 | 0.014178  |
| 186                  | Crip1     | 1.24E-07 | -0.6451   | 0.924 | 0.954 | 0.00256   | 186                  | Rpl10    | 7.00E-07 | 0.263651  | 0.914 | 0.916 | 0.014453  |
| 187                  | Slc9a9    | 1.34E-07 | 0.235153  | 0.29  | 0.165 | 0.002759  | 187                  | Lgals3   | 7.32E-07 | -0.12765  | 0.985 | 0.992 | 0.015121  |
| 188                  | Rps14     | 1.34E-07 | 0.223498  | 0.986 | 0.982 | 0.002762  | 188                  | Cd81     | 7.56E-07 | 0.356567  | 0.308 | 0.122 | 0.015619  |
| 189                  | Mbnl1     | 1.41E-07 | 0.306969  | 0.814 | 0.699 | 0.002918  | 189                  | Psmb8    | 8.03E-07 | -0.34445  | 0.692 | 0.802 | 0.016589  |
| 190                  | Rps21     | 1.42E-07 | 0.224764  | 0.993 | 0.978 | 0.002924  | 190                  | Cyb5b    | 9.13E-07 | 0.135842  | 0.177 | 0.135 | 0.018862  |
| 191                  | Cttnbp2nl | 1.54E-07 | 0.221724  | 0.49  | 0.422 | 0.003187  | 191                  | Nr4a1    | 9.21E-07 | 0.529843  | 0.556 | 0.387 | 0.019021  |
| 192                  | Fuca1     | 1.60E-07 | 0.199508  | 0.538 | 0.516 | 0.003308  | 192                  | Xaf1     | 1.00E-06 | -0.28425  | 0.177 | 0.392 | 0.020734  |
| 193                  | Zfand5    | 1.74E-07 | -0.32951  | 0.745 | 0.895 | 0.003588  | 193                  | Hspa8    | 1.04E-06 | 0.380006  | 0.965 | 0.936 | 0.02156   |
| 194                  | Sectm1a   | 1.76E-07 | 0.261268  | 0.29  | 0.211 | 0.003642  | 194                  | Mef2c    | 1.07E-06 | 0.293097  | 0.268 | 0.092 | 0.022011  |
| 195                  | Rps13     | 1.83E-07 | 0.257596  | 0.979 | 0.962 | 0.003769  | 195                  | Fos      | 1.15E-06 | 0.356499  | 0.874 | 0.919 | 0.023838  |
| 196                  | Utp14b    | 1.87E-07 | 0.124301  | 0.117 | 0.048 | 0.003867  | 196                  | Cat      | 1.18E-06 | 0.28181   | 0.338 | 0.176 | 0.024277  |
| 197                  | Clptm1    | 1.91E-07 | 0.133777  | 0.434 | 0.456 | 0.003939  | 197                  | Ct2      | 1.35E-06 | 0.243684  | 0.48  | 0.354 | 0.027889  |
| 198                  | Socs1     | 1.94E-07 | -0.29097  | 0.393 | 0.646 | 0.004006  | 198                  | Ctsh     | 1.36E-06 | -0.34692  | 0.712 | 0.847 | 0.02815   |
| 199                  | Akap8     | 1.99E-07 | 0.189974  | 0.29  | 0.175 | 0.004112  | 199                  | Ski      | 1.45E-06 | 0.272548  | 0.424 | 0.336 | 0.029934  |
| 200                  | Cxcl2     | 2.03E-07 | -0.61621  | 0.786 | 0.9   | 0.004202  | 200                  | Scaf8    | 1.45E-06 | 0.177446  | 0.182 | 0.158 | 0.030003  |

TABLE S2 (CONT.)

| Macrophage Cluster 3 |          |          |           |       |       |           | Macrophage Cluster 5 |         |          |           |       |       |           |
|----------------------|----------|----------|-----------|-------|-------|-----------|----------------------|---------|----------|-----------|-------|-------|-----------|
|                      |          | p_val    | avg_logFC | pct.1 | pct.2 | p_val_adj |                      |         | p_val    | avg_logFC | pct.1 | pct.2 | p_val_adj |
| 201                  | Stx11    | 2.13E-07 | -0.21156  | 0.255 | 0.497 | 0.004391  | 201                  | C1qa    | 1.54E-06 | 0.736931  | 0.48  | 0.308 | 0.031772  |
| 202                  | Atp6v1a  | 2.15E-07 | -0.2689   | 0.724 | 0.897 | 0.004438  | 202                  | Plec    | 1.56E-06 | 0.16778   | 0.495 | 0.545 | 0.032295  |
| 203                  | Clock    | 2.15E-07 | 0.145801  | 0.269 | 0.245 | 0.00444   | 203                  | Rpl30   | 1.61E-06 | 0.227803  | 0.965 | 0.959 | 0.033217  |
| 204                  | Slc25a1  | 2.18E-07 | 0.106117  | 0.262 | 0.318 | 0.004503  | 204                  | Lamp1   | 1.72E-06 | 0.248966  | 0.97  | 0.969 | 0.035508  |
| 205                  | Ifitm6   | 2.31E-07 | -0.32974  | 0.103 | 0.309 | 0.00477   | 205                  | Ifitm3  | 1.77E-06 | -0.31641  | 0.929 | 0.977 | 0.036566  |
| 206                  | Pcmdt1   | 2.34E-07 | 0.232332  | 0.483 | 0.395 | 0.004838  | 206                  | Ass1    | 1.90E-06 | -0.30642  | 0.131 | 0.328 | 0.039252  |
| 207                  | Laptn5   | 2.35E-07 | 0.228208  | 0.979 | 0.98  | 0.004851  | 207                  | Kdm1a   | 1.95E-06 | 0.271397  | 0.389 | 0.27  | 0.040255  |
| 208                  | Mark2    | 2.36E-07 | 0.102561  | 0.359 | 0.395 | 0.004867  | 208                  | Fmnl2   | 2.11E-06 | -0.29051  | 0.374 | 0.509 | 0.043629  |
| 209                  | Sl00a8   | 2.56E-07 | -0.58237  | 0.221 | 0.465 | 0.005288  | 209                  | Stx11   | 2.14E-06 | -0.31171  | 0.293 | 0.433 | 0.044137  |
| 210                  | Eef2     | 2.59E-07 | 0.274754  | 0.924 | 0.906 | 0.00535   | 210                  | Dtx3l   | 2.31E-06 | -0.32028  | 0.227 | 0.435 | 0.047715  |
| 211                  | Ifi30    | 2.62E-07 | 0.317628  | 0.924 | 0.883 | 0.005415  | 211                  | Rpl35a  | 2.60E-06 | 0.179422  | 0.975 | 0.98  | 0.053763  |
| 212                  | Tarm1    | 2.77E-07 | -0.28328  | 0.193 | 0.396 | 0.005722  | 212                  | Rpl4    | 2.63E-06 | 0.2647    | 0.722 | 0.669 | 0.054347  |
| 213                  | Creg1    | 2.97E-07 | -0.41984  | 0.821 | 0.904 | 0.006126  | 213                  | C1qc    | 2.99E-06 | 0.640487  | 0.465 | 0.316 | 0.061662  |
| 214                  | Tifab    | 3.05E-07 | 0.231532  | 0.455 | 0.371 | 0.006301  | 214                  | Atp2c1  | 3.11E-06 | 0.124977  | 0.207 | 0.198 | 0.064222  |
| 215                  | 2410006H | 3.16E-07 | 0.267389  | 0.455 | 0.37  | 0.006524  | 215                  | Zranb3  | 3.45E-06 | 0.130833  | 0.141 | 0.069 | 0.071304  |
| 216                  | Tcf4     | 3.18E-07 | 0.30895   | 0.662 | 0.558 | 0.006573  | 216                  | Fkbp1a  | 3.47E-06 | 0.266805  | 0.788 | 0.753 | 0.071679  |
| 217                  | Acod1    | 3.19E-07 | -0.54614  | 0.593 | 0.772 | 0.006577  | 217                  | Ly6i    | 3.49E-06 | -0.24818  | 0.025 | 0.155 | 0.072056  |
| 218                  | Nos2     | 3.22E-07 | -0.70414  | 0.166 | 0.349 | 0.006645  | 218                  | Gbp6    | 3.50E-06 | -0.33379  | 0.116 | 0.244 | 0.072181  |
| 219                  | Rps18    | 3.25E-07 | 0.245493  | 0.848 | 0.825 | 0.006713  | 219                  | Ubb     | 3.58E-06 | -0.20862  | 0.955 | 0.975 | 0.073856  |
| 220                  | mt-Nd2   | 3.38E-07 | 0.336176  | 0.952 | 0.938 | 0.006987  | 220                  | Ccl5    | 3.66E-06 | -1.10073  | 0.106 | 0.282 | 0.075659  |
| 221                  | Rpl9     | 3.40E-07 | 0.244205  | 0.993 | 0.963 | 0.007027  | 221                  | Srgn    | 3.94E-06 | -0.38888  | 0.99  | 0.972 | 0.08144   |
| 222                  | Fbxl5    | 3.51E-07 | -0.45623  | 0.538 | 0.705 | 0.007249  | 222                  | Acod1   | 4.10E-06 | -0.25192  | 0.48  | 0.7   | 0.084697  |
| 223                  | Plekham1 | 3.54E-07 | -0.26274  | 0.193 | 0.427 | 0.007311  | 223                  | Nrp1    | 4.16E-06 | 0.275088  | 0.237 | 0.109 | 0.085932  |
| 224                  | Trappc3  | 3.71E-07 | 0.139541  | 0.393 | 0.403 | 0.007666  | 224                  | Spg7    | 4.30E-06 | 0.147077  | 0.157 | 0.135 | 0.088704  |
| 225                  | H2-DMb2  | 3.80E-07 | 0.227344  | 0.331 | 0.191 | 0.007843  | 225                  | Tcp11l2 | 4.43E-06 | 0.278662  | 0.293 | 0.176 | 0.091419  |
| 226                  | Igf2r    | 3.97E-07 | -0.14298  | 0.138 | 0.32  | 0.008198  | 226                  | Hcar2   | 4.65E-06 | -0.39147  | 0.308 | 0.527 | 0.095931  |
| 227                  | Atp6v1c1 | 4.13E-07 | -0.27817  | 0.552 | 0.764 | 0.008519  | 227                  | Ptafr   | 4.89E-06 | -0.38782  | 0.49  | 0.687 | 0.100976  |
| 228                  | Eif3k    | 4.36E-07 | 0.24139   | 0.883 | 0.84  | 0.008997  | 228                  | Trim47  | 4.97E-06 | 0.150737  | 0.131 | 0.061 | 0.102607  |
| 229                  | mt-Co2   | 4.43E-07 | 0.217088  | 0.979 | 0.993 | 0.009141  | 229                  | Ncf1    | 5.20E-06 | 0.360422  | 0.49  | 0.364 | 0.107421  |
| 230                  | Top2b    | 4.65E-07 | 0.20273   | 0.386 | 0.318 | 0.009612  | 230                  | Ssr3    | 5.48E-06 | -0.3254   | 0.657 | 0.768 | 0.113107  |
| 231                  | Itgb7    | 4.78E-07 | -0.37717  | 0.31  | 0.535 | 0.009877  | 231                  | LTO1    | 5.81E-06 | 0.103705  | 0.131 | 0.104 | 0.119986  |
| 232                  | Tagln2   | 4.81E-07 | -0.40653  | 0.772 | 0.871 | 0.009929  | 232                  | Psme1   | 5.92E-06 | -0.30207  | 0.677 | 0.809 | 0.122242  |
| 233                  | Lilrb4a  | 4.90E-07 | -0.32507  | 0.834 | 0.937 | 0.010114  | 233                  | Pitpnc1 | 6.47E-06 | 0.346048  | 0.394 | 0.234 | 0.133535  |
| 234                  | Evi2a    | 5.42E-07 | 0.206481  | 0.641 | 0.641 | 0.011199  | 234                  | mt-Nd2  | 6.59E-06 | 0.362287  | 0.793 | 0.746 | 0.136006  |
| 235                  | Stag2    | 5.83E-07 | 0.191359  | 0.428 | 0.403 | 0.012045  | 235                  | Cd52    | 6.82E-06 | -0.38167  | 0.687 | 0.824 | 0.140851  |
| 236                  | Rpl22l1  | 5.98E-07 | 0.266161  | 0.752 | 0.742 | 0.012356  | 236                  | Itm2b   | 6.89E-06 | 0.248282  | 0.924 | 0.936 | 0.142278  |
| 237                  | Mttr6    | 6.04E-07 | 0.126478  | 0.331 | 0.354 | 0.012464  | 237                  | Ntprcr  | 6.99E-06 | 0.108637  | 0.187 | 0.122 | 0.144332  |
| 238                  | Ilf6a    | 6.22E-07 | 0.286241  | 0.6   | 0.454 | 0.012839  | 238                  | Mapk3   | 7.00E-06 | 0.18844   | 0.54  | 0.532 | 0.144497  |
| 239                  | Txnrd1   | 6.53E-07 | -0.28853  | 0.455 | 0.674 | 0.013474  | 239                  | Tspo    | 7.00E-06 | -0.2652   | 0.914 | 0.939 | 0.144543  |
| 240                  | Rpsa     | 6.71E-07 | 0.27361   | 0.993 | 0.974 | 0.013848  | 240                  | Txn1    | 7.41E-06 | -0.28481  | 0.899 | 0.962 | 0.153087  |
| 241                  | Rpl11    | 6.73E-07 | 0.251423  | 0.966 | 0.965 | 0.013889  | 241                  | Rpl37   | 8.17E-06 | 0.198732  | 0.97  | 0.952 | 0.168679  |
| 242                  | Irf1     | 6.77E-07 | -0.29562  | 0.8   | 0.932 | 0.013975  | 242                  | Rp9     | 8.44E-06 | 0.256958  | 0.52  | 0.438 | 0.174204  |
| 243                  | Rnh1     | 6.84E-07 | -0.30913  | 0.697 | 0.861 | 0.014122  | 243                  | Stxbp5  | 8.60E-06 | 0.20242   | 0.217 | 0.137 | 0.177491  |
| 244                  | Ppp3ca   | 7.31E-07 | 0.291134  | 0.655 | 0.562 | 0.015094  | 244                  | Ifit1   | 8.77E-06 | -0.41726  | 0.096 | 0.267 | 0.18101   |
| 245                  | Klf6     | 7.45E-07 | -0.3064   | 0.945 | 0.986 | 0.015373  | 245                  | Ak2     | 8.78E-06 | -0.28717  | 0.374 | 0.527 | 0.181298  |
| 246                  | Lhfpl2   | 7.46E-07 | -0.38135  | 0.207 | 0.399 | 0.015398  | 246                  | Sifn2   | 8.98E-06 | -0.25404  | 0.788 | 0.913 | 0.185517  |
| 247                  | Hlrf     | 7.46E-07 | 0.125651  | 0.2   | 0.152 | 0.015399  | 247                  | Gng2    | 8.99E-06 | 0.281464  | 0.662 | 0.601 | 0.185656  |
| 248                  | Ifi203   | 7.74E-07 | 0.331131  | 0.703 | 0.73  | 0.015984  | 248                  | Akap13  | 9.28E-06 | -0.43739  | 0.586 | 0.733 | 0.191718  |
| 249                  | Cysltr1  | 7.81E-07 | 0.254476  | 0.51  | 0.395 | 0.016129  | 249                  | Rcbtb2  | 9.41E-06 | 0.297642  | 0.419 | 0.244 | 0.194243  |
| 250                  | Bst1     | 7.93E-07 | -0.28952  | 0.579 | 0.767 | 0.01637   | 250                  | Clk1    | 9.74E-06 | 0.237196  | 0.636 | 0.573 | 0.201205  |

**Table S2:** Differentially expressed genes between exoASO-STAT6 and control exoASO groups in macrophage cluster 3 and macrophage cluster 5



**TABLE S3**

| <b>Naïve C57Bl/6</b><br>Cytokines | exoASO-STAT6 (4h) |   |      | exoASO Scramble (4h) |   |      | exoASO-STAT6 (4 days) |   |     | exoASO Scramble (4 days) |   |     |
|-----------------------------------|-------------------|---|------|----------------------|---|------|-----------------------|---|-----|--------------------------|---|-----|
| MCP-1                             | 202.5             | ± | 17.2 | 406.1                | ± | 84.1 | 8.6                   | ± | 0.2 | 10.0                     | ± | 0.6 |
| IL1B                              | 24.7              | ± | 8.5  | 17.3                 | ± | 5.7  | 19.0                  | ± | 3.1 | 5.6                      | ± | 0.6 |
| IL23                              | 37.9              | ± | 25.6 | 23.2                 | ± | 5.2  | 11.4                  | ± | 3.7 | 12.4                     | ± | 5.5 |
| IFN- $\gamma$                     | 175.9             | ± | 45.4 | 151.1                | ± | 45.5 | 2.1                   | ± | 1.1 | 0.9                      | ± | 0.2 |
| IL6                               | 9.7               | ± | 1.1  | 13.5                 | ± | 2.4  | 1.1                   | ± | 0.2 | 0.7                      | ± | 0   |
| IL-17A                            | 1.2               | ± | 0.2  | 2.0                  | ± | 0.5  | 1.6                   | ± | 0.5 | 1.0                      | ± | 0.2 |

**Table S3:** Cytokine evaluation in serum (in pg/ml) of the listed cytokines, using a multiplex flow cytometry analysis, from naïve C57Bl/6 mice injected with a single dose of exoASO-Scramble (12ug) or exoASO-STAT6-2039 (PTGFRN++) (12ug), data was analyzed at 4 hours and 4 days post injection.

**TABLE S4**

| <b>(HEPA1-6)</b><br>Cytokines | exoASO-STAT6 |   |       | exoASO Scramble |   |      | Sham<br>(no tumor) |   |      |
|-------------------------------|--------------|---|-------|-----------------|---|------|--------------------|---|------|
| IL-23                         | 11.4         | ± | 0.0   | 11.4            | ± | 0.0  | 10.0               | ± | 2.8  |
| IL-1a                         | 6.7          | ± | 2.5   | 7.8             | ± | 8.4  | 11.5               | ± | 19.3 |
| IFN- $\gamma$                 | 172.5        | ± | 127.8 | 167.8           | ± | 69.8 | 12.4               | ± | 8.8  |
| TNF- $\alpha$                 | 11.1         | ± | 9.6   | 20.5            | ± | 7.2  | 2.6                | ± | 1.8  |
| MCP-1                         | 56.2         | ± | 41.5  | 195.4           | ± | 85.2 | 35.4               | ± | 26.1 |
| IL-12p70                      | 2.1          | ± | 0.0   | 2.1             | ± | 0.0  | 1.8                | ± | 0.5  |
| IL-1 $\beta$                  | 4.1          | ± | 4.5   | 3.1             | ± | 2.6  | 1.5                | ± | 0.4  |
| IL-10                         | 2.4          | ± | 0.5   | 3.6             | ± | 3.8  | 2.0                | ± | 0.6  |
| IL-6                          | 4.8          | ± | 1.6   | 12.6            | ± | 20.8 | 3.7                | ± | 1.1  |
| IL-27                         | 19.9         | ± | 0.0   | 32.9            | ± | 25.9 | 17.4               | ± | 5.0  |
| IL-17A                        | 54.7         | ± | 137.9 | 5.0             | ± | 3.4  | 9.1                | ± | 11.9 |
| IFN- $\beta$                  | 138.7        | ± | 318.6 | 31.7            | ± | 16.1 | 22.8               | ± | 6.5  |
| GM-CSF                        | 1.2          | ± | 0.0   | 1.2             | ± | 0.0  | 1.0                | ± | 0.3  |

**Table S4:** Cytokine evaluation in serum (in pg/ml) of the listed cytokines, using a multiplex flow cytometry analysis, from Hepa1-6 mice from (**Fig 5A-J**). Sham mice underwent the same inoculation procedures as experimental mice and were used as no-tumor controls

**TABLE S5**

| <b>No.</b> | <b>Gene</b> |
|------------|-------------|
| 1          | CD163       |
| 2          | IL4R        |
| 3          | TGFb1       |
| 4          | MRC1        |
| 5          | AIF1        |
| 6          | CD40        |
| 7          | CD276       |
| 8          | MIF         |
| 9          | CCL26       |
| 10         | COL1A2      |
| 11         | ALOX15      |
| 12         | SELE        |
| 13         | CEBPB       |
| 14         | MYC         |
| 15         | CD44        |
| 16         | SIGLEC 1    |
| 17         | CD274       |
| 18         | CCL13       |
| 19         | CCL5        |
| 20         | CXCL9       |
| 21         | CTSS        |
| 22         | CSF1R       |
| 23         | C1QA        |
| 24         | C1QB        |
| 25         | C1QC        |
| 26         | CD68        |
| 27         | FN1         |
| 28         | CD14        |
| 29         | CCL2        |
| 30         | CCR3        |
| 31         | IL1B        |
| 32         | CD1A        |
| 33         | EDN1        |
| 34         | IL15RA      |
| 35         | IRF5        |
| 36         | IL12B       |
| 37         | CD86        |
| 38         | CCR7        |
| 39         | PTGS1       |
| 40         | CCL17       |

**Table S5:** Macrophage STAT6 gene signature
